# Supplementary material for: iCar-PseCp: identify carbonylation sites in proteins by Monte Carlo sampling and incorporating sequence coupled effects into general PseAAC
Source: PubMed Central journal article supplement (PMC5085176; doi:10.18632/oncotarget.9148), 2016-05-03
Supplement: oncotarget-07-34558-s001.pdf [file oncotarget-07-34558-s001.pdf]

## iCar-PseCp: Identify carbonylation sites in proteins by Monto Carlo sampling and incorporating sequence coupled effects into general PseAAC

### Supplementary Materials

**Supporting Information S1: The benchmark dataset  $S_{\xi=7}(K)$  used to train and test the model for predicting the possibility of carbonylation at Lys site.** It contains 300 positive samples and 1,949 negative samples. None of the sequences included has  $\geq 30\%$  pairwise sequence identity with any other in a same subset. See the main text for further explanation.

(1) List of the 300 peptide samples in the positive subset  $S_{\xi=7}^+(K)$

SAPAKGRKKSCKMGFQ  
 ENSLAEDKDGRKGGK  
 VTTGIRDKKGVTVKT  
 QCRLKLLKLERIKDY  
 NIGYGSNKKTKHMLP  
 VTGGAASKLSKIRVV  
 QTTWRKYKLLKTDLKR  
 RKLLMLKKEKLEKVV  
 QKKWKIMKKAALLIQ  
 GIGRLILKEEMKARS  
 DKLTTADKLLGELQE  
 KLQVLPQKASERLQF  
 GITNLGYKVLIQPSN  
 LAEKVFAKVLREEDS  
 SERSGTPKKRKAPPP  
 AAKEMEEKISNLKEH  
 ADAGRDKKEKVFEKH  
 SSAINILKEKKKREK  
 GPRLGDAKLKEKFKD  
 VSGEHKQKGKVKRKL  
 QQEVVRMKLRLQHSI  
 DLQEQMNKNKMMPVL  
 GQQDTIKKALNYSTA  
 SKVTYLGKELLRYVS  
 DEKMKAMKRSRTWGQ  
 KRQLQTPKEKAQALE  
 KEPVGEGKGTAKFKQ  
 EADRTSSKKTQTQEI  
 QRVLDILKSSHAVE  
 HKKPIDLKAIGKLP  
 VKQTVQSKILTTGEN  
 KRLGRRFKLLDLKKS  
 IPVQLVFNKIKLYW  
 SQEIKDTKECVQNK  
 TRFLEEIKNQDKLNK

CNHIREVKSLEELS  
DCSQDLLKKREHHIE  
KTLFSCWKESENEKLL  
SPPAAACEKGKEQHSQ  
AKEHKEPKQKDGAKK  
YRIELLRKVREQVLK  
RKFVEHVKSQGHKDK  
KTLNDSLKKVENKVS  
RQICVTQKLLPAKRS  
TEKEMIQKLDKLELQ  
KQIEKELKQMELIKD  
YDASVRNKQQELHLE  
KHLKTLSTVFSETW  
RSIIGFVKLRSNKVK  
NKVKRSQKLVYMGKL  
YTKKDTKKNACKSSD  
CNKLLAAKNINLRLF  
SGYEEALKIFQIKD  
PIKQVEEKPQRAQNI  
EPTEPLKGIQSRLR  
EPAPKKQKLSASVKK  
DKLRISTKKLEEYET  
LQIIPGAKHGNIQVG  
RKLVERRKQVKQLMK  
FKLGNKVKSEVNKLY  
IEEKDLEKLDLVIKY  
ECREEILKFLCIFLE  
GLFAGPCKVINAKDV  
MASLRRPKRIIRGH  
KVPADLLKRAFVRMS  
GNGGVVFKVSHKPSG  
IPEQILGKVSIAVIK  
DSRSLAQKIVATYRL  
NIPPLTMKRIRERFI  
ISGLGGEKDRWTEAA  
RNIYQGVKKKQYDIL  
LKLESKLIKADKLYLQ  
EVQEVKDKAQKIVDE  
KVLMPKLIKAKPIRTA  
LLNRLNRKMEIKPLQ  
HFRSLRTKLLLMSRN  
VIQEIVDKSGVVRVR  
GRNQEKLKFMIRIG  
KKRIKKRKGEAMALN  
TKEKAGPKGSKVSEE  
ERIFTGNKFTKDTTK  
KILKKINKAIVSKKN  
VANAVFVKNASEIEV  
CIVILTGKDPLGETF  
TEKLAGVKQEVIKES  
EREAELKKLQEARER  
KKYLEDVKLQARGQL  
AECVKQAKGVRQQAV  
SISQKKVKIELDKSA  
PLAGKKAKKPAKAAA  
AAKARVTKPKTAKPK  
FQQATKIKKLRAGKL  
SVRGPRIKHVCRRAA  
RFQLPLDKGNGKHKH

MASQRQAKIQRYKQK  
VFDKVSEKLGDKRLF  
QGKENLWKENLRKEE  
SGKLYKTKSNKELHG  
DRKTIPIKYPLKEIV  
ASFQAERKFNAAR  
GSLGSMKLRKSESK  
ESPHFYRKGTTPPRS  
KKKYEKEKEKNKILR  
IQYVVRLKKENVRLA  
TANIQDLKEEYSRKK  
ERLKRLOKSADLYKD  
DILQALQKLSKDNL  
KHLQQKLEKDRELE  
GEDDERSKRIWLDYP  
PDLRVVQKYPLLKEP  
TNDFTKIKGWRGKFH  
TLAPVVAKLGNSGAS  
AKEADQLKQDLQEAR  
AKKPAALPKVPKKE  
PGTTKTTKSSAVPPG  
IDIYLLKSRVIFQQ  
INRALDAKLSRQFFI  
NKLMTNLKSTAPHFV  
HKLEGNLKNRESME  
LEVKSDSKEDENLVI  
KLSLEESKKKGYDLR  
KETYEKQKGHYLAGK  
SQMQSGKEYRKDYE  
LLSVKQEKEIQMKMI  
IISFAVQKETQFHTE  
GEKYLQSKEDLRLML  
LMLIELKKKQEAGFA  
VTGREGAKDIDISSP  
IPKMKMPKFSMPSLK  
KLKGPKLKMPMHFK  
EMHFKTPKISMPDYN  
NLKGPKMKGDVDVSL  
EKAKSPVKEEVKSPE  
APKKEAPKPKVEEKK  
KARLERFKLRRMKAN  
LQSQEETKERRHSHT  
ADAKKKKKKSWVYEL  
ISLKKAKKPLPPSR  
IEIKSKNKVRPGSLF  
LAAMDATKLEYERAS  
KEEKKKKIKTIKSE  
GLGVMPPKAGQTITV  
GLEAAQIKELEELRQ  
ELKAWQEKFFQKEQA  
RKVEEVTKVCEGRRK  
TLVPAGIKSLGLAVS  
REVSQSRKPSASERL  
RGGGSPEKPPSRRRP  
KKFLPVLKEILDRDP  
IHVIQQGKTGNTEKF  
KIIKSSSKVHSFGKR  
ERMKRHQKALVRERK  
EMKKQTLKSLIILS  
PPPIKSFKEMKFPAA

QKATTGLKPVDSGCV  
IHKDLIKKPTISTAV  
CRGIIGGKSQRVNGL  
QLDRLLPKLARGSL  
SIVRIIGKMLPLEPC  
KEKELENKLEELKKQ  
KDLQEQNKKNEERMF  
EGKDEDAKKSLRTME  
EMSAKRAKKDVLHSS  
LLRMLEKRQMDRAE  
LESMIPIKMNFPQK  
SIEKTSKDLAPTSK  
VLAKPTPKAETTTKG  
MPRVRKPKTTPR  
KEERVSLKVLAKNFG  
KNPKEEKPKKEKKK  
SRTVRLKELRRALG  
ARVTEVMKALKCNVR  
LLLAPSSKKGKARLS  
DMLRLANKDSIGFFI  
GDRIQVRKVPPLKIP  
TLADIKAKAQLVKAQ  
KSIRAFKAGFLAEEK  
QMYEEQIKNLEKENY  
AVLLKTKKKGQKKSG  
HGVCSVLKGSEFMFE  
AMPGAAYKAKKAKGD  
RLLDEATKRSNRDSL  
TEHPYKSKKAVWHKL  
LLSVRMGKEEEKLMI  
MVTSLFCKLGVLVRH  
HFLPLMEKLLKKAAT  
EDGEKEEKAKEDKGG  
VIPVLQTKTRTNVPT  
PEPKKIKKAASPSQ  
TQNSYRAKEPILALR  
DCENLLKLLVLPNI  
LLAYKIKYPENFFL  
ERKSPEDKKSMLS  
MYLMLDNKRKEVVHK  
WSQRGKGKVFPLRK  
RGKAAILKAQVAARG  
AYPRLVVKLMPNGLR  
VPAAYVKKLDPAQSA  
KKFDDFQKDLKANES  
MAASRAKLNESHRL  
VEHWKELQLAAARG  
TELIRQEKLEQLAAR  
LKQSGQKKSITLVR  
KYDAIKFKINQLSEL  
DELKSSVTKDKKII  
GRIRLPRKATKTKKN  
RRKKRAPKADISKSL  
ALMEVMMKEMKGSIR  
SKKIPEEKVPVPVQK  
EKPKAPPKGPEISEK  
PIKGVPKKTPSPIEA  
VVRSEGKVHTLTLR  
PKIKVDVKFKDVTIL  
LKVTEITKDSVSITW

LDGGSKIKNYIVEKR  
ESSVLRAKEVTWYKD  
VQEEISQKALRSEEI  
IGAARTTKKRIPNTK  
GRNVKSRKLLKEIFNK  
PRPPSLKKKQTTKKP  
GAVKGLCKLFCLTLH  
LSSLGGFKLAHGLLE  
HGLLEELKTVLSSHK  
RLIGNESKGEHVPGF  
KAADALGKLISIIHK  
IGSINLKKNEPPLTC  
FEALKYPKFSKAIVI  
LTKQDKLKSFPKFS  
RKMEVGFKARGQPKS  
FAKNIPVSKNIRVV  
SKKPDKEKPIKEKDK  
EKLKEILKERELKIY  
KKLALSAKKASTLWR  
VNEQEPCKFLLDVAF  
VFKTRILKIIDEGLK  
LQLSKKLKTVLDQAR  
KKKLTSSKPPGELLV  
GLTVGFDDKDMMDIK  
QQLNGVQKQHICGR  
DDVALVSKALQAEEM  
TGDFESKKNELPDGL  
AARRRFLKLQQDQQE  
SKAKPSYKQKRQRNR  
ETRESETKCLKELPGV  
ANRLFGDKSLTFNET  
LKLEDTPKINSRFFG  
FFGEGTKKMGLAFES  
EKLIKDLKSKEVPEA  
EKLTALTKKYRITEN  
KFLDMLIKKLSFDY  
SYNETKIKFDKYKAE  
IDLLKIKKITAHTQ  
VSEHEATKCQSFRDH  
YLAPNNLKPVVAEFY  
YAVAVVKKDSGFQMN  
MNQLRGKKSCHTGLG  
LFSSPHGKDLLFKDS  
LSHHERLKCDEWSVN  
EGCAPGSKKDSSLCK  
VPQNTGGKNPDPWAK  
LCLDGTRKPVEEYAN  
AVVTRKDKEACVHKI  
YLGEYVKA VG NLRK  
TVKVPMMKRLGMFNI  
RSVQLTEKRMDKV GK  
SNTKVDK KVEPKSCD  
LHTLFGDKLCTVATL  
NECFLQHKDDNP NLP  
LFFAKRYKAAFTECC  
AEFAEVSKLVTDLTK  
LLVRYTKKVPQVSTP  
PVSDRVTKCTESLV  
CFAEEGKKLVAASQA  
SEVAHRFKDLGEENF

KAACLLPKLDELRDE  
SSAKQRLKCASLQKF  
DSISSKLKECCEKPL  
VLLLRLAKTYETTL  
CCKHPEAKRMPCAED  
SEKERQIKKQ TALVE  
KHKPKATKEQLKAVM  
DNEETFLKKYLYEIA  
WLNKTFKCKVNSGA  
VATALAHKYHXXXXX  
VHLTDAEKA AVNGLX  
GMYELLLKVRPEQLV  
EVERTRNKFLFLKAD  
LTAFTNLKIKHPTYC  
DICTLPDKEKQIKKQ  
AADKTNIKNCWGKIG  
KVADALAKAADHVED  
KAGQYTDKGLRKCCE  
MSAKEKGFEDMAKA  
DDSPDLPKLKPDNT  
KGACLLPKIETMREK  
VGTRCCTKPESERMP  
EKTPVSEKVTKCCTE  
LVELLKHKPKATEEQ  
XXXXX MVK VGVNGFG  
TVDGPSGKLWRDGRG

(2) List of the 1,949 peptide samples in the negative subset  $\mathbb{S}_\xi^-(K)$

SIAVQMMKRIHSLLE  
SPHEQEIKFFAKILL  
FGEQLIQSEPLDAV  
MASFSFLKDNSTDVC  
HSRALLVKTTLNISF  
IKVLSSSKVLSEEIS  
ETWRLWQKFLDDYSR  
RINEYVGKAATRLSI  
EKQKSEAKDRKVLEI  
EYRLDWAKWKAKIQS  
PGEHV FVKGYEKGP  
GILDRSSKSQSSASL  
ARLEADEKKQLCVLQ  
QNLQDAAKDMKKFEA  
FVILRDEKWGGNKTY  
RQHPDTLKYSTLMDS  
PTTLIPAKAPEIIDV  
QIQALEDKKEKEMSA  
THFVARLKSWRGNEP  
WYNLLSYKYLKKQSR  
AQPAAPAKVPSPGQQ  
SPQPESFKTSRSSKQ  
AARVTGMKKWPRTPK  
ECLVSAQKVLEGSEL  
VTSNEQVKGYGTHLM  
NRGWFCEKVVILCPF  
RILAAGGKSNHLHLW  
NEMASTEKLTDVARY  
GSKDREP KPRKREP  
QWQFLVQKSAEKSQK  
HAPQFPEKEFNITVQ

KMALEVYKLSLEIEQ  
RNTRILRKCIEKVAK  
KAVMTSIKQLSSEEL  
IRMSARQKQIMEIEE  
HLSSPPTKFFVSTPS  
LENSSGTKSAFVTVR  
EELRDYVKARLKVFY  
IRVCALNKVGLGEAT  
VINYIVEKQDTRKDT  
KCSKTSFKVENLTEG  
FSQPIINKVKPQLLK  
YRVEAAWKLSQWDLV  
KARKLFYKAIVRGKE  
NAEMHKNKLQYFMEQ  
PRLPKLQEEQREL  
ALEVDFEKMKKERDQ  
YSAVNPEKDIHGLI  
SSVNSLRKAAHEALQ  
RNTILWVKENKVPCL  
HTLVESLKLSITDQQ  
ALDEFATKLIQNNHY  
EVL MVWYKQIEQVLI  
NWCSQMDKGMLHFGS  
EKAPATPKTEKKDS  
AIPLLAAKANTKNTS  
ESIHNSPKSCPTPEV  
KEVYQRNKSNTIEP  
KREPKEPKEPRKAKE  
VFSIENSKFFEQYEV  
ALLADSEKPSHKSF  
KLVVTGLKEGAFYKF  
FESHQNYKDVQDPSV  
PLQQFCSKKLSIPE  
REPAGDGKSIRTFKE  
RYLYTLEKVCQPLYN  
NDVLEHVKHVFVINLI  
QALEDIKKFASVPE  
KGPALSRKRKKEVDA  
VFLTLYEKVFEDTYT  
TKVPEVSKKIVPQKP  
TEFQNHEKQESQDLR  
QEWFLGAKAAAKESS  
YGALAPFKPSEPGAN  
TTILQHWKCDSSWWA  
CRGLLLPKVVEDRGV  
GDYVDRGKQSLETIC  
NVLQYCRKSGLQTDY  
PKPPSKVSSSKESS  
GRPLVASKKYRISFK  
MQLPYRAKKFSLYCT  
DLSGADIKAICTEAG  
SKADAPVKWFKDGKE  
DGFVDQKKKLXXXXX  
DVQFYQLKLPMTVA  
LVNPAGEKAVFVNVR  
KEGLLQMKLPEPVKL  
RVNAWQAKANNNKQW  
ITGQLGVKPTGNSI  
GCFWVIKGCSPFLD  
AISDVETKETYSSG

SKPPGNLKECSPWMS  
LRWTRVNKDYVVYDT  
PVAAPEPKKETESEA  
LGTNGTVKYSISAGD  
EETARREKQQLLDVQ  
HQSADRAKSEMATMK  
EPPPSTVKTYHYLVD  
ENYRPLAKTRQQNIS  
LTMEINPKVPVNLLR  
DGPLSPGKMEDISPV  
EMDTDQLKLYEEPLS  
LYRSVYEKNMKIHI  
TEFLALMKKVSXSPL  
DNAPQFLKSKYFTPV  
KPEELVSKELSTWKE  
EKKNEVHKVEMFLGE  
RGPQVDVKGPFVEAE  
EMLTPEEKALLYEAI  
ITLGPPSKPKGPIRF  
IEKSKSLKQTDQPKA  
RNYLPALKVEYNTSA  
KRGAAVKTSGSPRS  
LCNQCRGKKAKNPKE  
EVCRAGSKHSRPIPL  
QKELVLSKPCKFEEK  
SRTRDVVKSALGFIK  
STDWSGVKKPIYLSK  
TGASGSFKLNKKASS  
KKAKKPAKAAAASKK  
GSELELAKMTMLLLY  
YYSALSGKSISDGHS  
KGSLEEEKRRAADAL  
GSLEQIMKDRWMNVG  
GETTHTDKVPGGEDK  
PLLPSLLKCLKMDTD  
SLESISTKVIVTQTT  
TSKMDLEKPNYIVPD  
QAHPVMRKCLQSLCD  
FHLVRDVKQGNLPPG  
IMEAPLLKHKDDIED  
TGPPQVGKTGSYLQF  
EEDWEINKDSAVEMA  
RVLQALMKRFYLPGT  
LSFINGYKNIYAEKV  
PLQEAESKVSMALIE  
VNRETDTKRPDARLA  
EHSEIHTKLYFLQWL  
ETADQFLKRSLEMRE  
RGHEELRKLESTLDG  
REHPFLVKGGEDLRQ  
TLENGNKQHQLGVW  
ERSAEESKPRSLQEL  
KYQALLSKMRAIDLQ  
NFSPNQTKFTVQRTD  
LVFCERGLQPPRKA  
AFSASARKVVNRDSC  
EKPPPVNKQENAGTL  
LLETGQEKMAGDQKI  
SLLIGVFKHGYERYN  
DITLTNDKPATAIGV

EVSEIHIKVKPTTKS  
CFPEGLVKSCSETLL  
TAFVQEPKVGETAPG  
PFSSADVPKVEDLD  
DLLSLSGKTLCVTAG  
SIEEPEGKLGPKFK  
INQVNTIKNEAEVIN  
YQPLRRSKRRWVITT  
TAAVQLLKPEGVLVY  
NTSLLSQKKKLEADV  
ESTPLANKPGKQSGH  
SCQLSREKANVKWYR  
DIAEQLLKANPPGKD  
DLTTILTKLAKTDN  
RVMGFPEKSDIFDVD  
EDTATSSKRRPRTRA  
YSIQDWAKRMKALVE  
NSFISIPKMEVKSYSY  
AGAQALEKLEAAESL  
MTTQLICKLLRSREA  
LRLLEPVKRAQEMDA  
XXXMAKRKEENFSSP  
IEIGLEGKGFEPTE  
RSVDSSAKREKPVVR  
MESICIMKGMKPERK  
EISESVGKNQFTSES  
APVPRGRKGKTKNQ  
QSPAVLDKADGQKPV  
KLNMMMLSKGELLSTL  
YTTQSTIKPXXXXXX  
HTQAGWRKEGNLGH  
AGTERWMKVVTLKPT  
KEAYEHTKAYGYTLG  
WYRLRLLKPQNIIP  
EEFVTSYKALKSRIS  
WNLRLDVKKNPVQDK  
TSLAIAQKLMELKLG  
KVEDLPLKLTIIYSEA  
VTACNPYKPPGPPST  
RGQVDYSKIMNGNLS  
GVIYTVAKEELKFFE  
TWSKDGQKLPPGKDY  
LANSAARKKKLLEAQ  
HPVSGVRKEQGGGCH  
IFTDSEIKDEAFLEY  
GEVQLTAKDFKTHAN  
SPTSPFYKACDTVFK  
SHDNIRVKWFKNDQR  
HMYKMPEKILPKILG  
KEKQEANKQKVPNPS  
ISFDDSSKTQSHSDA  
GAGEEEAKGGKRPKE  
GEEVPAKKTKTIVS  
VFLDSGRKTRSARRR  
NMVLPDEKGAGALPF  
SSEKLFVKYDLILTS  
TNLTDDLKALYKVAG  
FNEGPCSKILIQCKA  
VVPGASIKYDAVKEE  
MLQVTQAKKSQAIAS

KLLKELHKESKTRDD  
IEAHEQGKDIDLNV  
EVREAAAKTFEQLHS  
PIPPDAKELELMFG  
TVWRQADKHNIPRIC  
PRIQQAKTSLQEEM  
QSLAPGKFSPAGVE  
IDFRLFAKLNAFCVI  
TSTDILKVPKPEPI  
ELYSPVQKANPGTLA  
GATCNNKLSLSNAI  
EELPEISKTKEAATT  
QDPACSDKAPGMEGT  
QTLAGTQKFSIRPSP  
GKGSTFAKASFVAGS  
IIPHISTKTIDSWMS  
ITSEERTKHDRQFDN  
CIDDALRKNDFKPLK  
NRFEDCQKEEETKQQ  
HESTSVAKDKSSTAS  
AAHTQSFKQPSCTHI  
IQNVHASKRILFSIV  
ETTTAAPKMTKETAT  
QHTLNYWKEQSLNVS  
YKADTVAKVQGVFES  
DFEEQFLKEKRFHDQ  
IVALIAQKGNFSKTS  
LKIEAENKYDAIKFK  
QNEYNAVKEREHFNQ  
IETLRLAKNYIWALS  
GAWEQQIKQLEAELS  
WAEMCSIKAVTAIEK  
PVDNHRYKWNGRWWE  
ILLNLEKIPGKNAI  
FAQVFLSKFTMVKNK  
FLAGCQAKVEQAVET  
RIEEALQAAEKGTH  
LRDGQTYKFRVLAVN  
TLWFPPKDDGGSKI  
DATRLTDKLELCNK  
ENQTEINKPKAKRCL  
NQTVTEFKQLISKAI  
PEAKTPAKEEARSPA  
SSSIFCLKMHKEMIF  
YRCWRAHKEYLAILK  
KKEEKEPKKEIKKLP  
HTSVTLLKCTCTISM  
QLWHHWCKKDKELYH  
VSSPVIGKLNISETA  
DYHKTAKINIPADM  
GHTFLLEKPPVPPKP  
QVTMPGIKVGSGVN  
GVSVADQKGKSTVAS  
FLAQADCKLLECRNV  
ALHPNAFKRLGASLA  
SSCIDMGKELLARSH  
NASKEERKRWQATLD  
DSGTYTCKVSNVAGG  
TQILEELKTKMDNL  
TVEARLIKVEKPLYG

TSTTQHNVSTSPKI  
MSLDFYTKVLKSCRS  
PSPVGALKGSDVILQ  
DAMTHLIKISRIIRT  
GENMTSGKLTVAGGA  
ENRFGVSKPLESAPI  
GTRPGDVKEEAPQEM  
ARPAFNLKKPSKYCN  
HIFFDAAKNLVWKER  
VRYENNLKPVLKHVK  
KYEGAKVKVLEERQR  
FISDGVKSLKVVPE  
GIPPPTLKWEKDGQP  
QELEQENKLFKDDME  
QDNLGLQQLDLQRE  
SEAGVEVKKEVGVSI  
AAAEENSKMEQSNLE  
LAMAVIRKKHGMXXX  
ELLETLQKFKAVDKE  
WYQETHEKQQDLNIM  
RSVLESLKRYRFGKD  
LSSHSSKRDWSKSD  
VQVITHVKEKLFHMD  
ECPDAKLGPKFKMP  
DVETQSGKTVIRLPS  
IDYNPFAKGFRDDGL  
LNELTQLKQLVDAQK  
QLSDLNYKVEGEKLL  
WQEKFFQKEQALSTL  
VVSITCLKHKSGGHA  
SASLAHMKAKFRET  
EEKQTSWKEIDNDFT  
TDEDTFKEFLKLA  
SCTLLSEKDESSSP  
EKASQLEKTGNDASK  
FSFPASPKVFGGRLY  
CTKPITCKDELAPPT  
KVFERASKDTFQLEA  
MSPDQADKLPQLQGE  
EVLGDGVEKMKSMSQL  
LLEFHYYKCLVLGLV  
DLSAAPAKQFNLEII  
GFVLRGAKAETPIEE  
ESFFSNCKSLPEAPL  
QLDRETKEKRFVLM  
LRYRQAAKPPDLNPE  
HLNEVSLKPLSDVA  
LRIVVPLKDTRVKEQ  
SAATQALKRNGAQIA  
DSASIMVKAINIAGE  
NTFSFAEKNFEVNYQ  
ASLENCMKLSQMAVQ  
IQLPVVSKQHCKIEI  
RQSWSVCKQVFPGLN  
MDWGAQQKKANRSSE  
SGILDREKEERVSLK  
LSLQSEHKILHDQHC  
PYIAHSQKMQDLFSP  
LTSEETAKMMVKIEA  
RPEEEEPKVEPKKLE

DMMATLAKSQVTTVK  
EGKEEWEKGGKDEVR  
AAVSEDGKSDELLES  
QKELAEQKSVETAKR  
AYEDLSQKYKAAQEK  
NEEIDISKAAQTIE  
KGDKGRYKIVLQNKH  
PFLVMIKNLKKYFT  
SHVILGDKVTKNSSG  
TQEWDNSKSILGVQC  
TPHLRILKVGKGDSG  
HLLQYFLKFVPAGYE  
TSNGLVTKALEHAFQ  
RADQRKAKLGDSHDL  
RGGSGFLKSGGEMLK  
PDKEKPIKEKDKGQW  
LLFGQRAKTIKNTVC  
GEELVSLKEKSKSPK  
EDDCLAFKVHQYFNV  
FHLEFGEKSNKIKD  
YFTTQSWKTAQQHLR  
EILQDLQKRLESSEA  
AETEIVCKVVESSSI  
LDLKINLKASYIIVP  
VQAASSSKERGGVSL  
RAEVHLRKSADFDMFN  
FLCIFLEKMGQKIAP  
PKKTRNLKKITREQR  
IQIVYLHKFLMSLLN  
GLDTPCFKTSVNDSQ  
KREVELEKNTKEEED  
SDVWVETKPKKKARW  
DLSSQLLKVLGTRKL  
GQSQDNEKELAALFQ  
LILKEEMKARSSSYA  
VANLEEGKSYFFRVF  
VFFQSCAKAVMWQKM  
LSSDDYTKKKKKGKK  
TARFLYGKKVEGTAF  
DGAKKARKPREASGT  
FTVQLSNKLIMDIRR  
EKEQLRSKLEEMYEE  
QDLCSIGKEHVFSLE  
VEEGLTYKFHAAWSS  
LSSHDSIKMEIVDHA  
GFIDDAVKKLNELSF  
SSQDVESKRSDKTDF  
QDLEDLIKAKEKEVE  
DPMAGLLKFADDLGM  
PPGQLQVKAQPQARM  
EYDVTMPKVESEIKV  
FTEPAIAKNPYDPPG  
GHRKRASKSPRKTAS  
ESTIGHLKDVVGRIA  
QAEFADLKKLQDLTL  
LPYQNMDKTKTDYTR  
QKEIYQVKQQRLELA  
KNDFKPLKTLLQIDI  
EFDVNLSKANVDISA  
PYMVKMLKXXXXXXXX

RLYRKANKSSKLVSA  
STGTLVSKREVELEK  
TRVVHAAKAALAAFN  
ADEMDRMKKEYTDCV  
YYWGMESKIPVEDNK  
DSFTSAPKQTPDSGK  
FHKSVEIKPSDKHRL  
ETQIIPGKGQEKPLQ  
RENFDKKEKGKTPKYN  
TQQCVQCKESVGSGL  
KVASLLGKKGASATK  
IFENLANKADRQYE  
LQDQLLQKEQENAKL  
CSALLSVKEPATITE  
EGEEEGDKNGDGGCG  
GRSEERDKEELEDLK  
EEGLRSQKSDERQGV  
VKKLEASKIVKAGDS  
ERYLENYKCYRKMEE  
EEKAKEDKGKQKLRQ  
XXXMDDDKPFQPKNI  
SLPGSITKAGDFLEA  
ENLAGPGKPSKSTEP  
SSHRSNFKDPLQVAN  
HLCRIIEKKHVSLNK  
GDRVNYIKRSLQSLD  
DEVPPTIKLRLSVRG  
AALDNLRKVVP CYSK  
LSGVPLYKGDVPTQD  
IIPTFQDKSLSFPQH  
IGLHLVEKEIDIEKQ  
GTDYQLSKEYTLDVY  
KRRPQTPKEEAQALE  
NDSQEIFKLAKDVLI  
EEPWLEIKHLHESLL  
VNTATCDKNPSASKN  
TVVERLVKVTLYGSQ  
TQDTTTPFKITTLKTT  
VVMASFMTMQNAKN  
VTKNVRHKLTSRNER  
AIITQGCKSLSEMY  
AFAICDQKSVHGTF  
VSTSQAGKLPTRITV  
LKAMIMCKGCGAFCH  
ILSLNQRKEDLLVDL  
VYVYVAPAKSLVGQVA  
VSISAVKSAPEENS  
LPYFIRNKLCKVIVD  
DELALFDKSINEFWN  
YKDGKRLKNYNMPWG  
LDDISQIKAQVKELS  
IFDDWARKVQQRNLG  
KAARGEKDKETKNA  
AESD TDVKLSIFCEQ  
DRTRV PNKFRYPFYY  
GKYTCQIKNDAGMQE  
PVSASTPKIGAISL  
ERPVD EKRSDLLKL  
QIPKRNGKENG TENL  
QKPVLDLKL SGVLTV

FVCSFLQKNRKHPS  
VKSMKEPKTEAXXX  
MELLEAEKERNNKLS  
LEADIRGKPIPDVW  
YGEALGIKYPVQVPY  
PTMSIDLKYLGVQLP  
DFIQHIMKSSPLMFV  
ARQSFFLKTYLDHEI  
GPIIVEEKLEAPDID  
IVTRTTIKDQEDLKW  
THTELVIKEADRGS  
QAAFRGMKTRRHLKS  
VTMQSVVKPFSIFGQ  
SESSAPAKTEGRSLE  
NSYAGQLKSARFEEA  
PKFGFGAKSPKADIK  
LDATPVTKGVASAVV  
EDSDSPTKSSSTEPS  
GYSISHVKRVLDAEP  
RSPGGPTKLIIEISD  
RQSNRATKEIQLHQM  
IALLAARKNKILEMK  
KSQEVEDKTKEYELL  
SSNQEEPKAQGKVEE  
YYRAYVSKKEFLSLK  
WQAFDLKCRIDDFS  
ELWIRDTKYVQQPCV  
QEMAEFGKKAANRSW  
LVGIYGRKGLPPSHT  
ETSQRISKLQEDTSA  
LRKKMNLKPIMRMNG  
KGPELDVKGPKLDAD  
SKAMSVAKQVFNSLT  
KKLINFMKMLSQKLK  
KKLTRCLKPFENSRL  
PDRDERLKKKEKQERE  
LTQLSLLKDTLSAYI  
TETTEPVKASEAPSP  
VFETLIPKPMQHYI  
SDEAEDMKEAMNRMI  
ISNVSAEKATLTWTP  
PGPLPPGKYMAGLNL  
PYLEFRYKRRVYAQN  
KLLESQIKQLEHGWE  
LEKEKAAKLEILQQQ  
EAQVRERKLQEEMAL  
ISQTPLLKESGFRVD  
ARPLPEKEENEKSE  
KKEAPPAKVPEVQKG  
TRWVPVNKSAIPERR  
EKYLTKAVKVLQA  
LNVIVLDKPGPPTGP  
GLWLPLTKNVVIGIDL  
KEALKVQKNQKEILL  
ESDSVVAKNFVTPG  
EASDVETKLREFEDL  
LEVVDVTKSTVTLAW  
STDIVPAKKWDNAAI  
QKTTLVVKDCIRTDG  
DASVPSMKVHAPGLN

KMVVAELKSELAQTK  
LLRDLEEKVDKTELL  
KVQINVVKLIAALKN  
EDITTIFKTLHGNIW  
VEANQAAKEDTVVLK  
AELCGVLKAVLQRKT  
QEQLNELKTEIEALK  
ASDVSTAKSPFSAVG  
GANTGIGKETAKELA  
LESMMYGKKVLSQEP  
HLEITIPKDLKLKEA  
RVGAGPMKRENGLHL  
VVFVKVSHKPSGLVMA  
IEDEQREKSVSHQTV  
EEFCVIFYKMMSLRRD  
NILEGLEKCLKHLDL  
YREDSNDKISEVSSD  
LTNADEAKAQELMK  
PSEPTITKEDKTRAM  
MSDQECVKRNREEEI  
ELEELRDKNESLTMR  
ELQLLNDKVETEAE  
HPGYALPKAQTTVTC  
NLGSGTYKLTTMKKV  
VKSPEAVKSPKRVKS  
KLKMEIKKSRRHPLG  
KAKLAVEKGRKARKL  
LHQSRLTKLQSVQAL  
FVVPDAPKAPEVTTV  
SQDSEWSKREQIPLQ  
SSSFPLPKQYLDVSS  
CLLAILLKTTRASD  
LFKKNLNFKRLGAGML  
FGPAGTGKTESVKAL  
ASTTLDIKDSISAVS  
REAERAASKASSAHE  
VPLTQVAKEALREAA  
LKKMDSIKGSFIDLE  
ACPFLREKRGKNITT  
LEASKVAKQGESIQL  
WFLAAGRKWSCEAIE  
GKAMHTPKPAVGEEK  
QEMMSQIKYKKNAL  
ELCRRLYKLHFQLLL  
KASMASLKKTISQIK  
AFDADMLKVFRNAEK  
AVESIREKLLKAKPLL  
EIQQLLDKHKEYFQG  
ADLTNPTKVTHLYNH  
NQQQNHPKYSGQKNT  
VHGSGPSKDSFGELS  
MSVEEELKKDHAEMQ  
CIPNEYRKGSTVKSS  
LYGPIAFKDFILSKG  
ECSLSLNKKSRSSTP  
IEVVFVTKFLYSILA  
FDAAMNEKMDLLNDA  
YPNFEETKSLPWILL  
LTAQASLTKPIHTI  
CVDCYRMKRKNCQQG

PIFVQWLKEKEEVIR  
IITEAFPCKDIPQA  
IINITMTKKLDVEEP  
KKFEALIKKDLQAKE  
CSIQQQRKIAQYKLG  
EWESEVKKKSKIK  
WTLAAPFKEQHHRG  
AAASGGAKELKNIHV  
RMASLCLKPPKTRRV  
RCNKLLQKVQKNKEL  
DKMSFVEKVNKMTAK  
RYYHTLIKKDLNMVV  
RPRSELLKAPSIVAD  
ELVMSGNKRLKELSY  
EQDSLNAKLEGVSDF  
VTVENASKPDFTKNS  
EEPGETGKQLGQAVN  
QTFYLLQKITKDNN  
IKDTEAQKVSTQKTS  
DLLAYIHKQTEEGGN  
VTRFEISKLTEHQEY  
NGHVNFEEKLELAKQ  
LTEKRMDKVGKYPKE  
KTKNAVEKFTDAKRS  
RPDLIDMKSVKHRSN  
VRMLYYLKAELGEA  
VGTALPGKFKIVLDS  
PAGPPRKTSDAVVQ  
EWSRCTEKMIVRQY  
DAEANQLKEELEKVT  
EVYLVSGKNVGYAKY  
LVSDVDYKNYLHQWT  
KEKFEKTKGQPYAST  
LSSTAQLKVLEADPY  
KSQAIATKKIISDYH  
TMEQALNKSNNLNMD  
EIIISDVLKIPVQLVF  
NHLETCLKTQQIKSH  
LIQELQHKLNNQKKEE  
QKNKPISKKEMIQRS  
EPFSAMSKSTVSTSH  
SDMMENSKEEGTSSS  
VAHPLNEKMWSAVFG  
NMVEELEKALGMKLP  
LKQMELIKDQYQKKN  
DSDSEESKKPRYRHR  
YTCDCSQKEGVYRVA  
PISVVWLKDRGEVIR  
GLVYRGVKVMPFSTA  
SSYFHREKSNIFSPQ  
IEQFSTVKGVELEPT  
QELIALAKNRFSLKD  
ELDLWHSKLNELDSE  
REQRHMKRWEYFIA  
DTRTHFLKTKAAVIS  
PNSELCKPLCLMLA  
KPEKSLAKVEKELTP  
PKIMSPEKSHRVISP  
GKRHYEEKQKEHLDT  
VFCAETEKELSKQWK

YELTEEEKFYRNALT  
RRQLLLQKLLQRRRK  
DLLLETRKPDQVFQS  
ALHRLIAKSRELYEK  
WRSETEKHGQADSE  
ELIAKMGKSXXXXXX  
EKEVRAQKLADDLST  
SPTEGKRKIIIXXX  
EYNTVVQKPRQILCQ  
CQITGTPKIRVSWYL  
MRYSAEWKSTVSRLG  
PVAEVAPKAQEGEST  
ATLMTQCKEGAQKEG  
KKTNEILKGKLLKL  
FCDQQLRKEEENASV  
AILTALLKGTNASAF  
ARIHIPFKGRPTPEI  
QTERGRNKDKAPEEL  
VCNPHSGKEYFRVPD  
EAMTITWKPPLYDGG  
TSTGHKNKEFVARIK  
HSEAPFAKSDNQPST  
LNEDREVKNAEILRM  
LHAVWEHKLGSQVSL  
EVLHYSQKAQEKLLV  
PLNSAAHKESPPTVD  
LWLFEGEKIVLQVPA  
PYHSHCMKVTAQNSD  
VMDWINDKEAIVTSE  
AFSTLIDKGTHVAFL  
DSDINANKEELLRVL  
HSLNLLLKSIGATLT  
CDKRLWTKIDLSRCK  
LLISGGRKGFTYVFD  
QPLHRDGKLSLDQAL  
DFDDLERYWKNLTF  
FGDTEEAKKQINDYV  
TKEVEMMKAAYRKEL  
VSSSMEFKYDFNSSM  
CPPSIDLKEFMEVEE  
NFSSVLYKEDVSPGT  
APTIEWYKDDKELQT  
RNLPSDYKYAQDRAS  
PGQDNLVKQLRDAFD  
ELEGQIAKLEEQWLS  
TPDLLRAKRGQKLQS  
ITNYIVQKRDTTTTV  
STSDRAEKFCGQKKR  
NALDFVTKSYNETKI  
EHLEHEDKQNRRLRAL  
QASLHVWKIVVSNTTP  
QGEQLIEKSEPLDAA  
FVQAFVNDPLASTK  
RSEVSQVKREKENIQ  
KPLAASPKPAGLKES  
RQRNRKNKMSLALKN  
STVEVERKQVHILQQ  
AVDPTLLKTFEALKF  
MEKEHLNKVQTANEV  
QHAELRDKTTMLGKA

KGEVETLKAKIEGMT  
PASGADSKDWLAGPH  
DYIPYVFKLLKENLC  
ARQLLREKHKASIVI  
QALELPQKAEALKLF  
VLTEDALKSLENQTY  
HTILPGSKTREPSNA  
ESPSAPKPRKVELS  
PDSTVEFKAILKGTP  
ENHTPEMKHFVGLEK  
NYFAIRNKKGTELLL  
SAVGEHEKVINNQKE  
EEYEPEKMEAEDYV  
LGREVGAKFWELLLV  
YKRAMEIKEAETSLL  
QPGPDYVKQRFQEGV  
EGLQPAKAGTEDEL  
SLSQGRIKTFSQSEK  
VPEPILRKIETFLNH  
YSDDEYIKKIQRLE  
RETQGIEKLVLINKS  
RPEGLREKNSVIRSL  
LFLPFSYKNKYGMVA  
ETTSASLKKRHADSL  
ELQLDSKFLEQVHQ  
QVPTPVVKQTKLKQR  
CFESSETKKSVEQKL  
QLQLRHLKAIGKYEN  
FADIPTGKTSPYILR  
SRSFREEKDRSNKAE  
LQINELQKEIEILRQ  
YSPSPPPKRRTASPP  
KVVSVTRKPEEDGAR  
CLSAFLDKYELQIPS  
LLSIKWNKLEDVAQL  
VTDVIEMKDRLVSPD  
VQSLEGEKLSPKSDI  
DCIEAEEKVHVIEKK  
CVLRLGNKEKTSTAK  
LLSLLQAKVASLTLH  
KAALKTQKTSERKYE  
VREEILQKEITKLE  
RLFIISTKAGSLGIN  
ESGPEQSKQKKVAPR  
EGFFRSNKVFVESSE  
LCLAVPDKTVRWCAV  
VSELATVKRPQERSY  
GVKQEVIKESKVEEP  
NPNSSGRKKLTDSPG  
TPQILHAKKSYDLQS  
NVTFSFVKYRDTDTN  
GFVYIAGKCGLVPVL  
RASLKRLKPHVPLGR  
EKKLLMFKRVQEAED  
DSCVVAWKPPASDGG  
FCIQEIEKSGGSKEA  
FTSLEVRKVAETKEK  
FTGDEDIKIPENPLE  
EELAQLKVEQKMNN  
KKEAGNKKSTPVSIL

ITCPADPKKTLGIKL  
DVDDLIFKLAYYEIR  
ATYLLDGGKVVNVAGG  
IDHPVHLKFNVSLGK  
GSMNVSVKLKTCTLD  
KKLTKMDKVLGSSIH  
SWMPTLEKICEEVIV  
PEHLRTTKVNKQISD  
ENAAGVGKPSHPSEP  
MLEQTLQKVTELENR  
SLEMP LRKQEELEST  
KAEHVKQKGHYVGVP  
XXXXXMPKSGFTKPI  
KLEYSSFKTNQEKEF  
IELFSTEKKDKNDSE  
KMPQDARKILSNQEM  
LLDIILAKNPSGLTQ  
ERQVSHAKEKLTALT  
RWRKLVSKTQLEMNL  
NYIDEREKSISELSD  
PIEECRYKLYQEMFA  
QDRIPSGKQHQETSA  
ASDRLTMKNDHISAH  
LQMISACKGETGAMV  
VPSDEKFKCLQDQNT  
EDDDGSLKNVHMAVI  
KELNLLQKLYGLYDT  
TVSIMLTKYAAAYNTF  
SKAGVPSKSSGSAAL  
STFDYSLKDRAPFTV  
LFQQQGSKQKLHDCL  
DEEDEEAKAWLQHP  
EVINRIQKLRKKCNL  
IKVDVKFKDTVILKA  
LPLMESGKILPGVRI  
IRTALFEKVLDKIVH  
AGDGKSIKAFKESAK  
VKPQAKKKAGDQEEE  
IMDRLEKASSNQLV  
ANDLAAQKTKLWSES  
KAITCGEKEKQDLIK  
PISITWLKDDQILDE  
ATTTEEAKGRNPRAG  
QIIQIEDKTTIINNT  
ASQELDVKRREAIYN  
AVDELNQQKEGFRST  
EYEEDRGKGFFPQTI  
SRSPRRRKSRSPPR  
RLEERARKLQETNLR  
VMYNAESKGTSAQTW  
IFNQLEVKNPDSKMM  
ELLSLVYKGIAPGDE  
WDSMPMRVKLSIWKPY  
GISDLLGKSGITEDA  
SEEADSLKHQLDVVI  
NDEFEIEKPKAYIPD  
AGPTQGVKAYPDATM  
RCFVLQPKEKIVISV  
RISSSLGKKPSLTSE  
VLQDLEDKIRALKEN

CCPDMITKFLGVIVK  
GVAQANIKNGKHLIM  
DGTSANSKMEGLESK  
EASEGSIKLPKMKLP  
QYIFEFDKNDRLSSV  
EQSFYQLKVVASGGT  
QENTLTVKNKEGEIH  
VLSQVYSKVHNGSEI  
RHSDGTEKNKLPSQP  
IKEVEQSKATSQELS  
LQTLTDTKVFHFIDA  
PIGAAASKEYSLEKN  
FKSVLLNKTIIESLI  
RPGQQDGKEGSQPPP  
NPVEARSKYDVPGPP  
AYLGPTVKPDDKAKT  
GTSQISQKIIPLEL  
VSHSPPPKQRSSPVT  
FGGRNIKKQCCKMRK  
TVTIVDSKRSDTGTY  
EIIADGLKYRIQEFK  
QTNYRAVKEQLKQWE  
VSGPADQKTGTATVL  
DDEPEEGKKRTGKQN  
DVIEVTGKXXXXXXXX  
RGWTFHAKGLWLYLA  
LILMIFSKLLKHSVI  
DTGERPLKKSDESNK  
XMDVKERKPYRSLTR  
GEVTEAGKAYVPPRV  
QNIAAFLKENHDIDD  
FANFSGGKITKDVGY  
LFNTRYAKAIGISEP  
KDTTFRDKKSSLMEE  
EPGVPTTKTPAATKP  
EFGRLHCKFVVQTSP  
YSFVIDGKKTCKLK  
IISQFTEKIEKMQEL  
VTGYPQPKVNWYLNQ  
ANVSEGEKKTEESSQ  
AKRAELEKLKSQVTS  
HARDVVAKLSEDRVS  
CCELAFCIINSYCV  
DGEGRPAKSQEEGKR  
GYEKKRSKLIGAYLP  
SAVAPQRKMPLDDTK  
YRQNQELKVRVELLH  
KSPKADIKSPSLDVT  
IDSVECNKLLAAKNI  
RIKYIEFKKSTVILQ  
KRLQILLKGYGEYPT  
DAIVTWYKGPTTELTE  
LPYMIRSKLKLQLQ  
XXXXXMKKEGSSGSF  
YSYETIGKTTKTPED  
PRTEISDKITSELVS  
KKDKKDSKTDNKKSV  
NDVQSELKYKAEHVK  
VTHEQIRKETEKTFV  
QGLNFTSKTAEGHPK

RHHHLVRKTDVYDP  
XXMRLAKIICLMLW  
SLLVAGLKKEVQALI  
LKVLGTRKLMHVAYE  
HDPIMGNKYANRKS  
VAGSDTTKSKVTIKD  
RELRERMKPGFEVKP  
LTDLQVIKNETDARW  
IACNFESKYQCISKS  
SELSDQYKQEKLILL  
ERREVTGKWVRVNKT  
KTSEDIKSKNLRSI  
TENAIMLKRFNRYPL  
PIRFDEIKADSVILS  
QENEENSKNISTMES  
LPSEDLLKELQKQLE  
TILDDPGKKVKKPAP  
GESTTDWKQIRSIIM  
TTVGLLSKDSGKKLG  
QLQTTFTKALQDSNR  
DDTYLQLKKDLEYLD  
QEKPSRLKQRFLRR  
NYFHEILKTIEEEVK  
PTDFEWLKQSRFYFK  
VTDYRDMKSDSVAKL  
SEFVRFSKTENKITL  
SYRTYSEKEGPEKKK  
VLYDYVNKYHWEHTG  
VIRTTHFKVTTISAG  
SLSPQRSKLRIMSPM  
PHDIPESKDCVLTIS  
KLAAQMQLNQKRAE  
VNCKVLDKPGPPAGP  
EESLIYRKKYILSKD  
KAHVTDPKADPRALL  
VAHIIDPKAISKDHL  
KHLASHIKYREEYEK  
EFQREELKAKQVSLT  
FPNGVERKDAGFYVV  
QQISFTEKGSDEKKP  
RVAAVNVKGMSEYSE  
EKQAELDKVQAKFDA  
KEYTIVVKVLDTPGP  
RKLALTVKGKELSEE  
VTEVTSEKCVLSWFP  
PDLDLNLKGPSLKGD  
DLGPERRKSTELTI  
GVEIISIKPSAGHLS  
PTMRDDPKLVWFEHA  
PYWLDEPKNLILAPG  
LENAASLKLFAAGSLA  
ISWLREPKSKPQLID  
REQQLVEKSGELLAL  
DPVQEPNKSMEFETK  
SVSKSGRKIKGRGTI  
SEHMDDSKQESTTSK  
FEGNTNTKGHVKNFF  
QGVLDTGKKLSDDNT  
LFSKPASKEDLKQTS  
WFPASHVKLLGPSSE

MHISSQIKKTTDLTT  
HIMDQHWKFCVECEE  
EEVPPPPKVPALPKK  
RQLENSEKYEITYED  
HEENISSKMKGLNGK  
EEVQLTSKQKEMLQA  
GKVLVREKRVDLIQD  
SPGRCTPKSSEPAPA  
FEPPPEKEANIIVD  
KEVWNREKLTLOKSL  
GLALIQNKKEDVSSI  
GILEHQYKESTTYIS  
AQSQQLQKHFSSLEA  
LQVANFLKDSYTALT  
SLPPLPFKRGGGKDG  
KAENDRLKVAPGPSS  
SRATPPTKAVDPIDA  
HDAHLNGKVIGTLKN  
DKTSDGPKLFLTEED  
RGTSLVVKGLKENVE  
VNWYFENKLVPSDEK  
EGELESLENLPFTM  
ETISTANKANAERLK  
ISLPNIRKPDGYDYY  
DSAHGFLKVPPRMDA  
QAWSSLGKRADQRKA  
NPDDGARKPIPRDKV  
LEELSGAKISDLHRE  
EEHMEQQKENMEHLK  
SLLCNFTKSMEEDPQ  
LTENQFLKQLQLRHL  
IDYYIVEKRETSHLA  
HKRRPKVKRSKKRRK  
LSPAVRQKETVKNDL  
GHQNLHQKIQYVVRL  
SAVSQERKLQNSMLK  
KRLEQQRKDYAAPIP  
NDWFSNIKVNLKECF  
TAFYDSLKLVRAEQI  
RQPPDRFKFTSVTDS  
KMRVLQEKKQKMDKL  
LEAIGAPKPAYPYLE  
QENLNSMKKRNVNFS  
HPVEGHQKLDSSPDP  
IENQLAIKSKALDEL  
HYLQENLKSMEEQG  
RAPEHSNKSKDRDNE  
VVLQMSKHKTELKN  
MDAQTIAKLEKAFSE  
YSHGENHKLVSHEVQ  
EDDVTDPKRPLSFGV  
SNMPQSLKVGSIIE  
TKGGWQKSKGPKKT  
YTITLENKLG SATAS  
VKKENRGKGGAVSKL  
YRTYRAAKLQRENYI  
YDYESYEKTTRTSDV  
NLRKQYEKSSRFMKV  
KPGEMEKKMKILRES  
GPFTVVVKESCDGMG

FEELVEMKSNYYYSFI  
VATSRSEKEQLQALN  
LSFGVPRKAILYPHE  
EWLRNIEKVEVEAVN  
AIAAQVWKLSTCDLC  
DIHGPDACLKGPCLK  
ELHRTLKVNAMVQ  
KGDSPCLKPRAVHKQ  
NFSAAETKSDKKDCA  
VPMTEETKSITLFPD  
NTARLEIKSTDFATS  
DFQAANVKSSAHLRV  
YDEITDLKQLTVVME  
LNTLSEAKVETICHR  
FRTWQTRKQFLLYRK  
NRLAALPKGRPDRPR  
EIVATASKVDIAPHV  
ALTILRRKDESETEW  
LPLHDSLKLLQEQLT  
TNRGHTVKAVCESFH  
VVLPPIMKQPPMFSP  
CGAQAGIKISSVHKR  
DPPPFMFKPVKEEDD  
IIHDTQFKAQNLEEG  
PTLLSLFKHECSRVI  
LKALRVRKKTGGEKM  
QQKELLNKRNMVAM  
IFPSNYVKPKDQESF  
EASKEIAKLTCVVES  
PTVTWLRKGQVLSTS  
RVAELQRKPTRESEY  
CTAQLNIKERLIPPS  
DSSLLKTKRKHKKKH  
VSRAPITKVGKGVVE  
LTRSPRVKIDTRADS  
PFEVTWLKNNREIRS  
XXXXXMSKLSFRARA  
LAMETIDKAKEVGAT  
LSMSTHFKMLKKLVE  
EIYRWPIKESLKAMI  
ECSSSQLKASVCKPF  
EGILMHIKPENHCSE  
HPDNQQLKNEQEESI  
LPARQLWKFVWFKPTQ  
INFLENLKILEISED  
TVLLSMSKGGKRKDS  
PPATPPPKTRHSPTP  
QMYEFRVKAVNEIGE  
LAIESCLKGLLQAYC  
QPEDDDVKGQWDRLV  
QYRLLSLKYHPDKGG  
PVRPSVWKKHGVVNT  
TPTYITAKESQQMQS  
QGLASLRKSANKLKP  
WAGYLITKVRHDLAS  
KRMAQDLKDIIHLN  
SLSLSNVKGHGRADE  
PTPGITRKEEAPENV  
KSGRSKEKRKSKHKL  
KAREFGKKVQEEXXX

VIQCLRSKEVFGFYN  
AKSPAEAKSPEKEEA  
EVTIMEEKERAYTLE  
NAKGMVEKWLQQVEQ  
LQEQIVQKNQEIKNM  
KKEEVEQKKNEYNFK  
KVKSEVNKLYKLEI  
KLQRKKKKRKGSDDEE  
SEEDLSGKHDTVTVS  
DITMWLSKRLPQFLQ  
RKSCHKLKKRRGHLS  
DHLRNGSKPKRKNYA  
QCDCWLSKSEGDGQT  
ETYPRPTKEDVYVVG  
SIRENGAKSQDPFC  
QVQITQEKMRKEAEK  
IGVLAQSKFQAVRKK  
ELHTEPMKLALSIEA  
RRAPSPVKPASLERV  
QVIDMSVKSLTLKVS  
PDRTVAEKRGRKITL  
KKEPDDAKAKEPSKP  
KASLFINKEDVYEEY  
IDIHYGVKSNSLAFI  
MAGLGVEKLEKLMPE  
LSCSQYHKMYRTVKA  
PGFQGRLKYNFCEL  
LEVLSGQKLPCEQGR  
NWLSNAIKEFGFSGL  
SAMQSLIKYSGSFAR  
QMFLNDYKEVPFDAL  
RKESITEKKPKKGLV  
EKQAQLEKELSAALQ  
HALAIAEKSQEFLEA  
SNDSTHFKALHSNQA  
LFEVALPKTAHHFVI  
SPREESNKRQRTYXX  
LLPTPEEKPPPRI  
KLKEQLTKVKECYSP  
DMNIRGPKVDVNAPD  
HDKTAVEKDEITLKC  
KGYVVEVKEAAADEW  
EEPAQGGKDSIEEI  
SLHGTVMKINQERAE  
EPWTTDAKIQNKNCP  
PGIDATTKLNVGAPD  
RARGHAVKNSSHVDR  
QVFFNMVKETTSNCF  
SEECTSRKPGQTVNN  
MFCLEQEKRLPFSKR  
GSEQDGWKAEPGEGT  
RCICGLYKDEGLMIQ  
SLQFEEDKENSKEI  
QSILEQDKLTPESTR  
VFGRAQKNQGDRSN  
LTNVSRAKAEDALSE  
FRVRAVNKAGESEPS  
PPVTSPLKPNTPPSA  
KELDLCEKVSQYTG  
VTPPAGLKATSYTIT

TETQNALKEEEEERRK  
SLEEIMDKAYDKFDV  
LYCSMNSKHLNGTIT  
CNNVSSDKIGDKGLS  
PKTAKPKKAAPKKKX  
NIAIEFNKPQYFSIM  
LINGAEEKILEDFRK  
ELEALNGKHQQISGR  
SASPAVTKDQYSATS  
STETIICKDEYEAPT  
PDVNVNLTGPKIKGD  
MHIDTVLKEIAKTVL  
SFQAANAKSAANLKV  
DLASLPEKAAANEEG  
FTLPLYNKTAYVGEN  
AHREIEDKPVATSNI  
AYFVPMSKIADFLKA  
SQYTYALKEKAKYQC  
ARLDQMRKFRRQHEQ  
DLEYLDLKMTRDRL  
HMVALLDKDQAVAVQ  
KEIDMLLKEYLLSGD  
QAMGHRHKAGGAGRS  
SMLEERIKRSKRPS  
KKSLLEEKERFQREV  
ASSMTEMKFASMSAQ  
ETSKVTLKEQQHQL  
DRLITLSKKKAGHDQ  
CYYHVISKVPRIRTP  
PQKTAFLKDRLNAIQ  
KPSVGEEKDIIIFVG  
ESLMQSLKMNIFRLQ  
STAELLVKAETAPPN  
EKLLRESKELADLAR  
DTVVIASKPYAFDRV  
LPTKASSKAELEIAN  
LYICDYHKNLIQSVR  
VEHPQRSKKAVWHKL  
EACIELEKIVGELKK  
TRHLDKMSAMRKGH  
FLLNEIEKEEKEKLW  
CEVTGTIKAVDRLLA  
STQTESNKKMEENEK  
LPESGATKVEDMLTL  
ALCSWTAKKDNHLNF  
SGLDRMAKHLRQRKT  
RLQICDIKPRDQGEY  
NNCDYEQKERFLLFC  
KQEIMTLKEEQNKMQ  
KIQFLKMKIAEKQRQ  
TVAQYPFKVPGPPGT  
ERSDTNEKRSVDSSA  
KNLWVSQKRQQASFP  
NRDSQSEKDDGSDRD  
SSRESVSKAGMPVSA  
EDLSEELKKENPFLR  
LAVEIRQKSFQPKHP  
RQENMVLKLANQKNK  
KSEAGGLKQEIMTLK  
EATENTLKEASVESE

EGLKDDEKLEVSELA  
THRDSGFKNVGDITN  
NCERELHKLEGNLKL  
LSNLEEAKKKKEDAL  
NAKCIHTKFQVFKHQ  
KEEAQLQKCLGQVEH  
EITVSWYKGDTKLRP  
TPEIVLAKNNALTMS  
ANVEGDLKGPALDIK  
LLPVLIKEQLEPPE  
NSAGLLIKAYNRAGS  
DLVVDVGKPLTMVVP  
LIEPSVFKEAATPEE  
GNPFQANKHGERPVD  
AELRIELKKANNKVC  
EIIHDRIKREYGLET  
HVYYSRSKTTHIAT  
DSEVDNQKRGKRHYE  
DSGNYILKAKNVAGE  
GTRNYRKYRIGYRLQG  
SLLESVQKLDLEATI  
NENSNRQKLEHVKVN  
VGASQECKKEADEQL  
LQEERTCKVCMDKEV  
PSLDLSCQLASGLL  
MEVHEGDKYRMHSDR  
RQYCFYQKLQWATKI  
YVEPHELKEVSQTGD  
IQNERLYKEDYHGTK  
TVHDFPGKKLVSSE  
GPPEGPLKVTGVTAE  
AELQEMWKRLGHELE  
YFHISPIKLHLSVSL  
DAELRNTKWEMAAQL  
PQVSGELKGPVVDVN  
RRTTQSTKHGEVDAW  
SDNSEYSKSEKGNK  
PKVEGEMKVPDVEIK  
ENGVGEPKSSTVSVK  
VRQDSPTKRPALCIQ  
STTKRSPKPPNKKKT  
DFLAEIFKKIGSKEN  
SVAWFHEKTKIVSGA  
LDYELCQKHEMTISA  
TPHSHREKPGIFYQQ  
ENLVLQAKIHMPEKT  
VVERRDIKRTWVLA  
TTASAHLKAGCPMLA  
NEARINAKARRLRK  
CCLTFLVKVSKALL  
LRQCMLPKSAALSEK  
AYEEQKKKVADHPNR  
MLRDLQEKINQQENS  
QVFNQIVKSRPHDNI  
PQCVAIDKLLKCKSS  
SDDYDRIKCHVDEQS  
CVGSIALKAPPRFVK  
QFMGQAFKSIHEKVS  
LPTRALQKIQELEGQ  
GHLNPSEKLQKLNEV

LEQARQEKDKLPLEK  
PAYDGGSKVVGYYIE  
ARHSGHHKKRRKEKK  
FDTDTGLKQALETVN  
IPQIILAKANAINMS  
FEDSGNPKSPDKAQA  
SNINVEAKFNTVVSQ  
QQQIRPIKSVIPSPT  
QLKASLGKVGVKEEL  
AVYAVLDKVKTKKST  
IQVASNAKVAASRKP  
SIEHQEIKHTEFLKE  
LYCLSDEKLIQKISX  
IPATIQQDKLIIRFTV  
PQQGTQMKTKEFTSP  
LKEEYSRKKETISTA  
LSVSESQKGEERDRK  
SVLRECDKLRHDGYR  
WEESQTQKIQNLEKL  
KSTRSSVKLQGTSKI  
GTDCLEAKEKVHVIG  
VFQREQTKQVEELSK  
SSEPWEYKSSGNRA  
PCGRWLAKNEDDGS  
AGAKSRPKKREGVHL  
SEPSEFYKAADPIDP  
GNQTTALKHAKDVKD  
RGPGRPRKRTHAPSA  
VTDEPLLKMLLTKAD  
GMDNQGHKNLKTSQE  
LPSPCKSKSLGDLTS  
KPLDLRPKKTRAMRR  
STFVDQCKTVLKLAS  
FRICAINKAGVGEHA  
NEIHTNHKTLYDLKT  
NLQDDLEKQERSLQK  
KEMTNHQKKRAAEMM  
IRTEQESKGPMTTRRL  
KVEAPPAKVSKKIPE  
EKARDREKAQELLKF  
SGGLIPGKSLVFATM  
MVVLVQEKENDYYCS  
LRSAPAYKMQFKNNV  
KKRLERIKSSRXXXX  
IVCPFFIKTGMFEGC  
SNCNGEEKKLDDSCS  
WLQETDHKSIEDQLQ  
CLHVSAQKMLDGASF  
RKYDKRRKKRAPKAD  
EIATSQLKSDLTSRD  
LVQWVVQKVAWFLQI  
TFAFNQMKPKSIPYS  
AFQDHPEKSEQFEEL  
CASSLPIKKIAGSNY  
ETRRYALKNVTILVT  
LDENIFPKQISLRQA  
RKVEEIVKDHLMYLD  
LGPEEVRKSALTLMV  
IISEMESKLVEQQLA  
PPLVPAIKEDAGGMI

DGYEFFAKRQLVTLF  
PALQMAFKLGLSYTP  
MHSNSQDKEVTILAE  
IDGLSGEKIRWTQQS  
GIIVRWCKVDDDFTA  
ENLEFHIKVSYFEIY  
EKQIEQQKKIQMSNL  
KRRGPKKKKMTKARL  
MYLNILRKKITVNSS  
SDTVHQMKPYLKKS  
QKPTKAPKPTSTKK  
KDKPLIYKGEKWL  
QDLRATAKVPSPDE  
FDSRGDVKVIMATNR  
LLGQAEDKAEVDMDT  
PELVQAVKNTAMFSK  
TSTLRHCKYSVTCLI  
LDERAFEKTLTPHIQ  
DFLDFMTKINGLEVQ  
LRWVRAIKTPVSDLR  
PEMTTAKDKTTERD  
AASPLEPKELEELRD  
HTISVRVKAAPYWLD  
VENPAGSKTVSVKVL  
EKKAQLSKYKSLQQT  
ILDITDVKVEDSGSY  
EKSPLPQKRITNIE  
QAKIQEAKEKVQINV  
KLKVEAVKIKKTLKN  
KSALGFIKVAVTVMD  
IKVKSEEKIKVVEKS  
RTWAEAAKTVLEKYP  
TVLHG NRKD NELIRV  
VKQAEKAKDSVYKRS  
TNGEHTSKATLELSP  
DFACANNKICDELEE  
LHSNPEPKTFTFDHV  
TVARTMMKVMKLTTG  
RGPKV DIKAPDVEGQ  
ISLGEACKKVFLDCC  
LGYHVERKERNGILW  
PGPCPSVKVKEVSRD  
KVTNQVSKQKYKEDY  
FTCPHCAKVCKTAAA  
SRIDALEKAGQKLID  
NVDISAPKIEGEMQV  
NALNVSNKLYREGWD  
ALIRTLGKQLNVNRR  
VTLVEAIKQVVKHLP  
ISVEQDGKVKTLMEF  
HQNTMEDKFIVCLNK  
NLNSLCRKYHSAELE  
KAAALACKKLKSLGL  
PSVSTHIKVKSEEKI  
DEEEVSDKGS DSEEE  
VGPDGLMKLN GSALN  
SSEHDVLKEAVLKKL  
STYHIPTKAEASTSY  
VTMDSAPKPF TDVSI  
LVSDNNLKDYFERGR

GLRPILTKLYKEKGV  
LQLWQRYKDYSKQCA  
LGIENQHKISVPRAP  
DCQRIELKQGYTFVI  
TDTVSDVKYKEDLTW  
EPPSFVTKPGSKDVL  
EQWLDDCKRTFGAKE  
QEVIGKLGKLCPSVA  
ENGSLEIKMIRKEDQ  
MEEIENLKKQHDLK  
LQYMTMAKLQKEFGP  
FRRLQFNKHGVL RVE  
NAFLEFSKEVDAQSS  
RDHLAEAKEKLSILE  
QLPLSRIKFTGKECE  
WRESSLLKNLWVSQK  
DLKTQAGKDDKGKRK  
KNNGQFVKASASLKG  
LQGPSDTKDLHSTKW  
KKEPVTRKAGLLFGM  
DSAEALLKKHEALMS  
QTYGSTLKVTXXXXX  
SFDFLAEKLQFYQRQ  
SAPAPQCKALCRKPE  
ATGLDEEKRARCDGK  
KPENLSSKTRGSIPT  
SCASNSVKFGVEMLG  
AGPPTPCKPSSPGAD  
DSRVSSAKLNNFSRL  
ISPTNPTKLQITENG  
QLLLEEIKSSKDQLK  
LKNVSEEKMAAIVNQ  
QKNSTLPKAIVSSRD  
KQLEKMRKFLDEQAI  
LFNWYNRKNCILADE  
NDDISGYKENYTRWL  
ITNYIIEKKEVGKDV  
FKIFRETKENEIQDL  
QRVRENQKNFSLLQY  
SRLSTIWKGFINMQS  
DPLVTVMKVEKAPQE  
PELPLQTKDAADGEA  
KRCKLLGKSSRKRQD  
VSFSAGVKVRFLGG  
LENMQKLLKIRMCPY  
LKKRKGRKPRWTKVV  
VETICHRKEGGSLI  
KKETTVKKAVVVPAR  
VFEYFNAKSKHSWRK  
PSVENRPKIAAFLPA  
CLYQTNSKLYESLTY  
QKLVYMGKLEKESF  
AALRPLVKPKIVKKR  
ALRAEVSKLEQQCQK  
KQKLYHKKIFRTAML  
IISDSQIKASEFLGY  
FDTSAAYKSILRKKV  
DELTTEIKELKETLE  
EILMSLQKVL SGLGG  
KHGFSVLKGQAELQM

NRVNHIVKKIETENE  
TYVAQFLKHYPDIHN  
YGVNGVGKILKKINK  
IFRLQTEKDLNPQKT  
SESELESKESQKDEK  
SPSPAPEKKEKTPEL  
EAPLPSPKLEGELQA  
ASPDEGWKRCNAAAQ  
KLKDDTEKREQKDEE  
DEIRTSKLNLNQFLP  
YGAVTYRKS KRGPQKQ  
KVLASYQKTRSAVIV  
NTMMELRKCCNHPYL  
KFRLEEQK VRRQEQE  
YGVFMLHKKTVNQKT  
FAPDPENKGTEVCMV  
XXXXXXXXMKKGSQOKI  
VPTQPLLKAHPKFSK  
RISDAENKHILELSN  
KQVTQESKEKKVSEN  
TFYSQREKPGIFYQQ  
ENYQTLPKSTRHPSG  
DCEEAFKLNPEGKPR  
RVFCSYQKKGFDIKW  
TLTETRFKTGTTLKY  
KQGDELAKLSSSFKA  
GFNTSQGKLLRILF  
PIETERSKCDITGLL  
HPTEEALKISVASEP  
EIVECILKRGQKATL  
PEDKKEEKEKPKKEV  
GSDQERTKKRRRGDR  
PENHNNAKEPDSEQQ  
SELSQYKEAQAELE  
VANVVGQKTASIEIV  
LSITVRTKKQELSEA  
EFEQIMLKAMQEFTL  
QEAMLFFKKSEQEKK  
FTLQYLNKLSMKPEP  
PRKAKEPKKAKEHKE  
APECMALKADVAKK  
TSTPLSGKESVFFAE  
EIMEHRFKTYQQFRR  
YLFIQTDKTIYTPGS  
LEAVRQEKQKETAKC  
SEFSSFDKNDSRGQE  
SLLTFIDKAMHGELQ  
FREGQILKVFGDKDA  
KERISAAKVAEPPQR  
IKASDITKSSCKLTW  
EVQVLDDKNVRRRFR  
FHKLNIPKLD FSSQA  
DAGLYTCKVSN DAGS  
QTEETLTKVSATPGP  
EDSEQELKGYACRHC  
LNINPDRKEHNCREE  
NFILLFYKVSTSSVV  
LLDVNLAKFLAQDVP  
FSTALYGKLLKLPTC  
LDPESQRKRTVQNVL

KNSNGIPKLKYIPLK  
SSAPSSPKLQHGSTE  
KLEYIYAKQQALEAQ  
DQLKLEKDIQMWKV  
RRVAQAQKALSDVAY  
KESARDPKPEASRAS  
DRMTEESKVEAELHA  
FIRTRLEKEGIVFKS  
YSSVSQRKYYSTKHF  
KALLLEAKQKVPPVL  
EANPLTWKQLLCDLV  
IAEELSYKTAHEDIS  
LQNTDAHKRAFHEIY  
CKATLSEKLGGAEVA  
KEETNIVKLEKQYQ  
CNSVHLCKQLVESGA  
LITPEDRKYGTTNLH  
LLDYQDHKGADSHAG  
TECHARFKTPEDAQA  
ATVNIQLKGTNEYVP  
KNLDHVNKILKAKKL  
ANQGCVRKVYLKDTA  
LQQATPPKNYQPAAH  
LCSQLLCKDPAERLG  
QEEVIEVKVPAVHTK  
KTKRISAKKRDVQQQ  
CLTENVLKEIAKAGR  
EDEETDQKCSLSSSE  
LISLQEAKDICEEQV  
LRNLVHSHKHKMIAMG  
IVCSSEIKRQVVETM  
EPPRFVSKLNSLTVV  
NCRCEISKSLCCRNL  
STGGEHKKSDRKEEP  
AETLNQSKERNRFSL  
SEPSELIKVLGEKPE  
VAGGAISKPLTDQTV  
AFKNIASKIANELKL  
PVLQEEIKESQDPQH  
RSLVEQHKRERKELE  
VPGPDAQKTETPSVS  
QSISENEKLQKLKER  
DLKGTGKLLDERLV  
GKTGNTEKFGRFRQC  
KWIQLLEKIEEALKV  
VTAPEPKIPDVAPI  
VVRGWLHKQDSSGMR  
TEVELFHKDIEAFKE  
LTKQIQEKQGQSEL  
VPTFTIPKLYQLQVP  
MGLKGPLKTPIAAGH  
VVYCEELKCWCRAIV  
SSEEPTEKEPPGQLQ  
HLRTRVQKVQVKEEP  
GRIETDTKVLEILYE  
LACQENCKKTLTIE  
IGTQTNLKCRRGIEN  
NSKVKHKKKHYKPSS  
EPIRNSVKERESERN  
SVTRSTFKFTRLTEG

TEDLEDAKKELAIRL  
PDSSPSRKPPPISKK  
IPMAPSCKLLFEVHN  
VIENVSKSTSTSEP  
GVNLIRSKVEDPAVI  
PICRGIHKGTVRTFL  
CTTHLYIKAPAKFVK  
LVPGNIFKSSGLTDG  
RAENLRFKEEGVRDV  
EIEVSQLKEQSVLEF  
IENIDFNKSGSSTAS  
LEDEAARKAKQGKEN  
LVAEFPEKEAQLSLV  
EISLNHNKIEQIIAQ  
QSLKDLEKEFVDFWE  
PLGLIMLKTTSEELA  
GTAPTTLKEPAPTP  
VSVNVSSKEFLQTES  
LSMGTRRKVLVLGSG  
LKEEIKKKKGIKEEV  
EFWDVIQKHCLEAHQ  
NVLLTCCKDNVCRLW  
TTASNYNKSESQESL  
AKRELESKLQRLQAQ  
TIAEQESKLNEAHKS  
LKQQAQEKQAQLAQT  
QLSLLPNKDLFIWDL  
ATQLEQMKEDYSYIM  
HQPVSFYKLLTNNT  
VRQVEALKAENSHLR  
WLQDVDDKYDRMKT  
ALGMHESKYLILPVH  
GAVVEFVKELQDIEV  
CEIPVEVKPKARLLR  
RLGSPSGKTGTGRIS  
QDLLHTTKHQDVLLS  
YVHTNGPKKKKVTLH  
LHEFDSLKDPEVNEF  
LEAENQIKKCDIRNK  
KQLTDNLKEKALSFM  
KEIKKLPKDAKKSST  
TKMDANDKKIQSLEK  
LAHWSPAKLLLQMDS  
LEELQDLKGVWSELS  
LEEHMFHKLIEAGET  
AVAVARQKDSGGSGR  
EHLGCWKQCPSCGA  
SELHESWKYNMSFIN  
GFYVVCANRFGIDQ  
SHNVQQLKSRLMTA  
KEAYEKSKGKHVGR  
KLRLMEQKFQQVDEW  
IFHGVMGKDEREGNS  
NMHSARFKNGKQIRK  
DKVDGLQKQTESSSD  
HLKQHCKNVLLRVRM  
NSDQHYSKESNYFYS  
TGFALNLKPLAPAGI  
DGNHLYLKIKNAMPE  
QGLPGPEKLPGLSRK

PDFERVNKRLCPTTS  
NKLPLPSKSVDWTHF  
KFTMVKNKALRKGFP  
RQQSSSSKGDSPELK  
KEFSDLEKKFKDKSQ  
IGSLDVEKCKRATEI  
ISLNDVSKAEGILLL  
VNLHRIEKDVQRCDR  
AQTADPIKVAEVPQP  
FPLWESTKVVPLSKF  
AGFEDEAKTSARDA  
CVSIEGYKTPYTDVN  
AFEHFAQKGPTWKEP  
LSPDSFIKDNYGLNQ  
SGEQVDGKGQAGSVS  
LEEIRQAKAQRKQLH  
VVEVFLEKFTTEWDN  
RANKKKQKVFQHNE  
LETGDRVKMKTLSAY  
AEREQVIKLGTTNYD  
DYCLDIIKKFEVSEE  
DMDEAIEKGEAEQSE  
SSLSDDRKWIIFDGP  
YCTSPDFKMGGASDV  
FGVPSEPKNARVTKV  
AMEESPRKKKKRQKQ  
WELYIPPKQNKSVLV  
DSTADDSKDSVAQGT  
VIQFELGKQKNIMPL  
GGLRRAVKVQCTWSE  
ENYIEELKKQGFLLR  
SFLLIASKSVNMKKE  
TFRWTSCLKHSRSEPQ  
IQESSPTKNNIAVSS  
KEAVYEKKQAVHKEK  
FLAPVFTKDEQKHRR  
NQKRAELKLVVDRLO  
HFQTHLAKLLETQEQ  
QRRYLEKRSHSKK  
GRTTDLKGLQSPRG  
RWIREIQVTKLDRD  
KDKEEHGKIKREELD  
CSGILTVKEPPSFLV  
QKQFRLFKTAALVIQ  
SNANMLRKGPAEDMS  
KSEWMDLKKEYLALQ  
TICSAYLKINSKGE  
DFPKVRAKEQTFMFP  
IYTYFVYKTRNMDMK  
KFAECLEKKVDMSKV  
SIKAFAEKLSVKLKE  
IANITALKDQLLAAK  
VMVKAYLKKYDPEVQ  
EKSLKRIKDTNKDIS  
NDLSTENKLVKHD  
KMVAWFEKSKDIIQS  
KYRAALGKLPQQAND  
FHCNILMKDDKDPQC  
PDHMLGKRLKGAFK  
NLSVTSFKKIVYREY

VVENSEGKQEAFTL  
DTCVCTVKLKEPPRF  
VQAENLVKEASEIPL  
GVNSLEVKFRTRSEN  
ADLGVIYKIKLRHDN  
IQEVEYVKEEAKMVY  
FGNAIEGKSNTVASL  
SICQARAKELEDLQ  
ISQLTEEKNDLRNMV  
IPTIQWIKGDQELSN  
GLSLEDSKKLTA  
SPS  
LLDSPLNKEVVK  
VSA  
GSTFPDVKPDLEDVD  
RESVNLGKSEGFKAG  
VVDSGLHKEERYDLK  
DTVRSSFKPGLEARL  
PWMRLFFKIKPLVKS  
SSHEAEEKLSEHKAL  
KLKVKDNKKNRTKKK  
GGGGMAKASAAELK  
TQTPVSNKKPVFDLK  
DFLIQTFKVFQKNQV  
NGCMNRFKNALNSCD  
NIELVDLKPLPTARR  
RVQEAEDKWRGAQAL  
SDLHVNAKGPQVSGE  
LYTQLEAKKAAIKPL  
FLENEDTKFSLSDQ  
CLIHPRIKVGNEYVT  
VEVPTVTKRERKIPE  
SSSEDSEKVIAGLYQ  
PVSM DICKQEEKLGF  
MACTWSVKEVASYQP  
AQNRARAKEFHKKTL  
GQPDEELKPKKKVFE  
GEVIALDKIFNKVEK  
TLEERLDKACEPGVD  
CGRWLSLKKEDGRLE  
RDAAELEKWIQEKLQ  
INLAGVGKPSLPSEP  
GLGKVGSKGREAPLM  
RVTYSPRKEKALKIY  
ERFDVGPKEKPLEEP  
NEVINS PKGKKR KVE  
RYLN E EY K K K M S Y M I  
AVYTCEAKNDYGVAT  
QSSGIGSKAGVPSKS  
QMIEKR SKL GES QTL  
SDPTPDGKLFATQYC  
RFTMEVPK K L T E W F K  
AGAGETLKQECDSL  
G  
DAHEDSFKSADESGQ  
NVFN NLAKGFSEGT  
A  
EPHIQPTKSSSRQNI  
EPQLNRLKEKAQQLW  
MPIVDK L K E A L K P G R  
LDVEIQDKPDKPTGP  
IVSALWEKWLSLLEA  
PGLELMEKEVEPEGS  
EILINNFKYIFSHLV

NIQNWVYKLTSSDI  
TTMDTNGKPLYILTY  
SDAGIAGKVERNIFE  
EEAGGSVKEEAGPEV  
RLGVSLSKGLHHKAV  
ELALARMKDLGIQCR  
ELLLGHEKAPAFRDY  
EVQISTEKQKNSTL  
KHRLRELKLQVKAF  
RMIVRCRKQDFPLVK  
LGSPTYFKKQFSDPV  
EWIVESIKAGRLLSY  
EHHPRVAKYAMENHS  
EEEEEEKEEDEEET  
KTVPLTAKEERGMGA  
GDPIPNVKWTKGKWR  
HLTEETLKVTAIPEP  
LEAMLRNKELKLQES  
ELTQEALKVSAVPQP  
RHLIEDLKFRQKVN  
EIAPEEEKPVPVAEE  
LPEPPVLKVLSSLKP  
SKGIAFVKFARSSQA  
NTMDVVFKEPSFDWK  
VTVIGIPKPKIQWFF  
YIAETDEKKINRIRQ  
EQAEIQIKEESKTAV  
LQTGACYKSLPSRNG  
WRADINSKKVLREAG  
EKLSILEKEDETEVQ  
TKIIIEEKKTLELKD  
LLAPHRQKWVERIRY  
RWKPM SVKHTEKLER  
KNTGELKKS KVL SHH  
ARCLRVGKLNIDRLY  
VRSSGYGK PSSPLKM  
SAIIIQRKWRAILPA  
TVIQSAYKSLIQHLE  
RLAEETEKLRAENVF  
ETREDRTKRLFRHYT  
PMIPQSGKQHLLDF  
HERSRRRKHKRRPKV  
EFPLPDEKTKKRIFQ  
TCASAVQKTFRVTR  
ELDQDLAKAYLTVLA  
EQNHLYLTKAAVVT  
GLLGASFSTGSSVP  
RLSSWCLKKPGHVAE  
ISSLTPKHLQAGMQ  
EFSDDIVKIIQAAN  
YLDSTFTKRDPGEY  
IVSNEAGKASCTHL  
NDNAPIFKEDPFISE  
ENIQTLKSKEQEVN  
PVLPEPKIRAVSPH  
DRVQAIVKGTKQRLV  
STGPITAKDEVELPR  
HRDADETKEWIEEKN  
LEPDLAEKNPPLFAQ  
ENIHSRMKTVKLPKK

VPGFCLPKKGVTSIL  
VKAGEVLKINADIAG  
PGVQGDVKGPQVALK  
TKHLETSKQLAAAFQ  
PTSYQAPKHFHIPAG  
SVHSREAKESSAAQA  
ERNIEAGKDDGLTDA  
CSISQELKLSFTYE  
SPQRLCSKHMPQLHS  
VPVPVQKKEAPPAKV  
ALKMSPYKDILETHL  
VSRYGELKSVPTTQC  
QPSLRAAKEHAMPKD  
AKDLEQHKKIQEEIL  
RTLTYTAKPVGIGG  
LKKLEEEKAEAAEAA  
MDAENMRKELAELES  
SPLKEDAKAPEKEIP  
NVSSRGGKKFLPVLK  
EEEVTVVKGQPLYLS  
QEERAFKVDPELVV  
DSLAAHVKNLLQCES  
KEVMAAYKGKRRSEA  
GLVAQLQKTVKELQT  
RLHTRQMKRTKCADI  
NGFSAMAKTVGLPTA  
QRLLEAQKRLEKLT  
KAKAQLCKIEKSKSL  
LPCLSLRKLPPRSEI  
QKLAELEKILESNIKE  
ADSLYVEKIDVGEAE  
XXXXXXXXMKWVTFISL  
VFRRDAHKSEVAHRF  
DLGEENFKALVLIAF  
CPFEDHVKLVNEVTE  
ESAENCDKSLHTLFG  
EMADCCAKQEPERNE  
DNEETFLKKYLYEIA  
PELLFFAKRYKAAFT  
ECCQAADKAACLLPK  
DELRDEGKASSAKQR  
LKCASLQKFGERAFFK  
RLSQRFPKAEFAEVS  
KLVTDLTKVHTECCH  
DDRADLAKYICENQD  
NQDSISSKLEKCEK  
CEKPLLEKSHCIAEV  
AADFVESKDVCKNYA  
VLLLRLAKTYETTL  
DPHECYAKVFDEFKP  
EEPQNLIKQNCLEFE  
FEQLGEYKFQNALLV  
ALLVRYTKKVPQVST  
EVSRLGKVGSKCCK  
QLCVLHEKTPVSDRV  
VDETYVPKEFNAETF  
DICTLSEKERQIKKQ  
TALVELVKHKPKATK  
KATKEQLKAVMDDFA  
DFAAFVEKCKADDK

TCFAEEGKKLVAASQ  
NECFLQHKDDNPPLP  
XXXXXMGKGDPPKPR  
LDSEAFQKRKQMQEI  
PQLSEYCKMPLKMWL  
IILDTLEKCLAGQPK  
KAQAAEMKAVHEAEG  
KVSTEHNKECLINIS  
MHLIQTGKGEAIRIR  
QELISLAKSRYSCRD  
VVFVQTDKPVYKPGQ  
ALKLQKQYLMWGL  
TVPETGRKDTVVKVL  
ALNDHFVKLISWYDN  
AEFAEITKLATDLTK  
SIGLGYHKDLQTRAT  
NCLAPLAKVIHDHFG  
ALVGHLLKGYRHPS  
GRVHESVKRSNCYMV  
EIIQDISKDVVDESN  
VTLGCLVKGYFPEPV  
VFANMQMKLSQSRPI  
ADGNFDPKPINTMNF  
VVGYYCLKVPLVVK  
NRTWQDYKRGFGLN  
AEGSPQYKKWYFELI  
GIISIPKLPKSLNKE  
KQLRKIVKHEIMSVK  
DGFAESTKRKAAVWP  
LYPMLFNKLNKNTISK  
TRHMEAVKTQFLEQA  
VVAASEAKEDSPAQT  
ATAPEDDKAPAEPE  
NNLHLQEKSDDPVK  
EENGMAWKEILNLLY  
QHSPGLDKENVELSP  
TALAELVKHKPKATE  
TVRKQVTKSYKMADE  
EFWANLEKETDWLRN  
DVAVWFSKRLPTFVN  
RFAGPFSKQTQIPDY  
CAIYTYGKPVPGHVK  
DLVPGSFKSQLQEGP  
AAVRQRMKCSSMQR  
GELLITNKSELIFA  
WLTAYVVKVFLAAN  
ARYEREMKTYIPPKG  
LSGFIPLKPTVKKLE  
SVSRVELKPGDNLNV  
RVTAILDKLITMTIN  
NMVIADV KMLSGFIP  
KCCAADDKEACFAVE  
ISCADAEKEIMRLGT  
ANHVLFKTEEHMRPF  
SVRFVCQKGFVLRGS  
VSREINLDYEGQQK  
QMLFYICKLTS HQM  
FPNNYWDKFVKKRVI  
GGLVEGAKNIRVTKI  
SSPCSSDKQNVXXXX

LEPDLEKVVTYLAG  
RYNMPLEKQQPAFAL  
QYDSTHGKFGHTVKA  
KEYDPDGKGIISRKE  
NLLQMTEKFFHAIIS  
DLLVHCGKLCALVYK  
PSFSSETKSACKEED  
LMVCNHEKVGLQIRT  
VERSYAVKSGKWYFE  
YAVYSLSKSYIYLDT  
MVLSAADKTNKNCW  
LLKETAFKFKALKKV  
GMRDIPMKYSCORRA  
AVINSLEKAFWNWVE  
GMGVPEIKYGDSVCF  
FAYKFLRKILKYVDS  
NSLDFDQKNNKDSNS  
RGNFLEIKNKFLARR  
SLSHSPGKXXXXXXXX  
NAFERQNKAEGLGMV  
AADFVEDKEVCKNYA  
SVLGMPDKVEDMCPD  
TVKAENGKLVINGKA  
LFIVSISKTLANEP  
LQMISASKGEMSPMV  
PPVEPNTKVFPVAVFL  
DQTEQWEKFGLEKRQ  
EIPLQILKTKALSML  
ERAATVTKKTYEIIWH  
FQVELPRKAFITNFS  
EISCWTVKIXXXXXXX  
TDQHGLAKFSIDTSS  
QAELLPSKSVSLIIL  
NTLCDEFKADEKKFW  
PTLSQQRKSQNEQDT  
YINVDCAKLRLLKE  
SLLNGNSKYMVLVPS  
EAMQAYPKQDRPLPS  
TNVEMILKFFDMFLK  
LLALLLLKDFDSVPP  
VTVQDFLKKQVLTSE  
MSFSAGVKNWVDHMM  
GVELMEAKSQLFLKY  
ALLDERTKKSNRDSL  
ESHQHLSKESMAGNK  
SPEALVGKSLYVSVT  
MAPSLTFKEKVTSLK  
PMTVICQKDLSWSML  
KVTSLKFKEKPTDLE  
EILKSLDKEAIREDN  
VTYPGLSKRRLKPEA  
LQLSGPDKVTISLLS  
VAFNFFRKFYNKSED  
VIPELNGKLTGMAFR  
VDESNINKKLFLDSL  
TVYVDAVKDSGRDYV  
RWPSHFQKEAFVKPG  
VREDMETKCFICIG

**Supporting Information S2: The benchmark dataset  $S_{\xi}(P)$  used to train and test the model for predicting the possibility of carbonylation at Pro site.** It contains 126 positive samples and 792 negative samples. None of the sequences included has  $\geq 30\%$  pairwise sequence identity with any other in a same subset. See the main text for further explanation.

(1) List of the 126 peptide samples in the positive subset  $S_{\xi}^{+}(P)$

GKWELYIPPKQNKSV  
PLPRKRPPVTQAAGA  
QRPARRGPPPLARAV  
ASKLQVLPQKASERL  
GYKVLIQPSNRRAIH  
KVSAAPGPADQKTET  
PASKDTRPKEKRLVN  
GRKSTEFPRKIREQE  
KQRAKKKPNPVEEEP  
YYYWKKTPEAASSRA  
QRNRETAPRTIFQRV  
KSLQAKFPSNLKVSI  
NSRTMLLPLLRFP  
EPQKQVQPQVQPQAH  
IAKQSLRPFCTVCNR  
ERKQNLRPMPKKYHS  
SPVQKANPGTLAAEI  
PTLPKRVPRAGEARN  
VVRLSCLPAFKDLIA  
KERKMAVPMPKRRS  
LKKAGRIPEQILGKV  
ASLKRLKPHVPLGRN  
STKEKAGPKGSKVSE  
VGIPDKIPFKRPCTY  
YQDLGLPCIVILT  
KTVMGAAPELKVRL  
AGRLFLIPATIQDKL  
AKARVTKPKTAKPKK  
PNSRFSAPSCGSSEK  
VFKLLECPHLNVRKA  
CSGKKVEPSALACRS  
KEKQPTMPILKNEIK  
RLKNEKEPMVLKLD  
STIPLSHPKIPRCQE  
VAKAVECPPRRTAR  
GSETPDGPLSPGKME  
KQATDVKPKAAKEKT  
KKEEKEKPKKEVAKK  
EVKKETPPKEVKKEV  
KKPAALKPKVPKKEE  
KESLKVGPLDSVTYL  
LFNRIGDPSVDEDAQ  
LGGKLGPDVKLPDM  
KIPKMKMPKFSMPSL  
VDLHLKGPKVKGDAD  
NMPKISMPEIDLNLK  
KSKIKMPKFNFSKP  
PKGRPDRPRDLELTD  
DSKKEEAPKKEAPK  
KEEKAKKPEEKPKTE  
ADGRGMLPKRAKAPG

VVRPEEIPPVENRF  
RKRVSLEPHQPGTP  
KKATSCFPRPMTPRD  
FPENKKQPYYPFD  
STLERVLPRVRFTRH  
VVERRRRPRDSPTLS  
YKPKRGRPKSKEMPQ  
IPREKKPPRPPKKKY  
KIHRNRYPVCTKPYA  
ERSPGGRPIHKRKRQ  
KGSDEKKPFKEKGKT  
RALGVQTPSIRKSLV  
ELIEELHPIIKEALE  
NPKEEKKPKEKKKKG  
MDPSAPQPRAETSGK  
ILDLC AAPGGKTTHI  
KHTFSVLPGDCQQRL  
RVPRRASPLRTSRSR  
KKKGRDPYAYIPLN  
LLKTHFLPLMEKLLK  
KIKKAASPSQSVRR  
KKAKSPTSPSPPRN  
KKLLVLNPIKRGSL  
RRRAPPPPKRAPSTT  
LPGPEKLPGLRKG  
PDMLKNAPMLKSMKN  
LMEKEVEPEGSKRTD  
KLTRCLKPFENSRLR  
SYRTVEKPPKFTEKG  
EEIRSHRPTLDALRE  
KVSRTVSPKSFACAF  
KSTLAIDPATSKEIP  
KEPFKAAPHTIHPPC  
KVPIKQVPGGVKQLE  
PAKVPEAPKKIVPEK  
PEEKVPVPIPKLKP  
PEVKPKVPVPAPVPE  
RPIKPPGPPINPKLK  
PFVVPDAPKAPEVTT  
TQEGRQQVPAPQQK  
ARKALCDPLEEVREA  
LRLKPKQNIPTVK  
KKPLKKKPTVLLPQ  
VIRSLKRPPPADAPT  
PRKRTHAPSALSPPR  
KQDKLKS PFKFSDSA  
GNGHISSPLTGKRQD  
IREATAAPHGKRKRK  
LLVNEQEPCKFLDA  
KTLGIKLPFLVMIK  
ESKKNELPDGLNKKR  
LKLYRLLPMRAAKRP  
ASQRCDPPSNPVAA  
RRAHTANPLHRCRCG  
AVETEPEPELRQQTE  
VYDAYLAPNNLKPVV  
GLLYCDLPEPRKPLE  
CLDNTRKPVDEYKDC  
EFQLFSSPHGKDLLF  
FFSEGCAPGSKKDSS

QNTGGKNPDPWAKNL  
KTPKYFKPGMPFDLM  
RNGQWSEPPKCLHPC  
EFLRACTPGASLRKG  
SHFRHGIPFFVKVRL  
ENVGTPCPVSAFPSS  
LSHKDDSPDLPLKLP  
DKGACLLPKIETMRE  
ARLSQKFPKAEFVEV  
KVPQVSTPTLVEVSR  
GTRCCTKPESERMP  
CVLHEKTPVSEKVTK  
ESLVNRRPCFSALTP  
VELLKHKPKATEEQL  
KRVIISAPSADAPMF

(2) List of the 792 peptide samples in the negative subset  $\mathbb{S}_{\xi}^{-}(\mathbf{P})$

LCGMLSLPWIYSHSD  
SGGSYVYPPVQEFPL  
YIVPDYMPVVYDKLP  
TTAGATQPAAPTPTA  
QMANNFTPPSATPQG  
KGSETYSPNTAYGVD  
STNMGILPSVTMYNF  
GKSTDFAPIKEDFGQ  
HSWQEQAPNQPPGPT  
REKLKAKPLLLQLPI  
SSFIKRQPLVIARLA  
VLGEYYTPALKCEVN  
LRRVAGTPCGVFGQR  
ALEHEYEPYSRLKSD  
VIINQLQPFAEICND  
KSDDPVVPSLFKQKT  
SDFDFSAPKINLEIE  
VGGTIKSPKNNEKNF  
TGRQIFQPLHALRNA  
YLSTEDVPLARMLVP  
PEKEAKSPVKEEAKS  
SHGEKELPQWLREDE  
SPTASQAPNQPPAPT  
LEKQFVKPDGENRAR  
RFMEIESPHINENYI  
RSLWRLEPLRISWSG  
EEYIALYPYSSVEPG  
DALKSREPQAKPQLD  
AIIALFTPTTDPEAE  
SSALGEKPITFYRQA  
PIPKKLPKPPPKVPE  
SLSSAGRPGPSEGGD  
RLCNDLPPGTVKLX  
AELEIANPPELQKHL  
NIVGIGKPSKVSECY  
RDIPAMLPAARLPTT  
VMTLKWTPNQLMNGS  
KPSKSTEPILIKDPI  
AELLANMPDPTQDEV  
IKLNYALPPPLHQTE  
VQGLGVMPPKAGQTI  
ISQNESRPHFLIELF

PLVDHTSPSSDILLF  
SSTVNGVPSRSPRLV  
TPEDQDLPPCPEDIA  
RCISSALPRRRPPVS  
SSISDHTPWLMPPTI  
SLSHSACPTPNPLSR  
MVVCWGHPDSDGGSE  
SESSFGKPXXXXXXX  
RQFDNLKPSGGYITG  
TVLDANDPPIFTLNI  
SWSRISNPSAFSIVP  
SSIALGDPHIPTSPE  
FNQSLKSPSRLGCPG  
PPLLASMPAQLPPRD  
IAQDPKQPPDPPVDV  
ECHISGYPSPTVTWY  
KASVVTLPVYLNFR  
NTSSDCRPSESELL  
WVKENKVPCLCNYK  
SWLKDGLPLKESEFV  
EEVDCMDPTCSGRGV  
AESPEVLPHIEKELS  
SCRSEGTPAWYMHGE  
VAFQLHLPLSQRACS  
DRFCLSSPTEALKMG  
QVRVVAQPSLPAVPQ  
WIRDALRPPLQNINS  
HKESFLAPVFTKDEQ  
AAVQKAIPMYKIATK  
WGMESKIPVEDNKRF  
AQNPVDAPGRPEVTD  
SEDSVQVPRNLVGKV  
YPDIGWNPCCGERYL  
IGSKAGVPSKSSGSA  
SLEPHQGPPTPESKK  
LWGCHSAPHGPGLIY  
EIGDGFLPVCSLPGG  
GAETLTFPCDRWLAT  
LKASVCKPFLFLLKK  
ESGKIQEPFSAMSKS  
GTQVSQRPGAQALKV  
KEQQKDSPVFCRFFH  
QSRPTGVPTPTSCLS  
EMFGVWEPLLEPLEI  
YTEVANIPVARPGRR  
SRLDLPLPGCAEPP  
YLNKKGNPKKFAFLA  
AIESLVKPQAKKKAG  
ENIDGILPLHDAVAN  
GKLYIEAPTFDLQGS  
VQIKKMEDPEQLRND  
KRKKKKRPEDTAASA  
SERLQRAPLKSVGPD  
DPRQLGVPVIARDIE  
ELLSTTHPANKASLT  
SVTVTTIPASQAMNP  
LSAHTILPGSKTREP  
ALKISVAPGLADQKT  
DRGEIIDPFVEVEII  
HKDLIKKPTISTAVG

DRETILDPNLQATLX  
DGAVPAAPASADAAR  
VLAERKSPEISERIV  
SPHPPLQPLTGSAGQ  
FLPASTAPMQGKRKS  
LNNSSSSPQRSVDQR  
KNALENYPNFRSVVD  
ERLALAGPQLRPEMS  
LKSQTQHPWEKLLNL  
NANQNASPNVPGKRG  
SLEMGILPREIRKLV  
EATPTAAPPTLPPTT  
EKHTHHAPLSPRTFH  
QYRKVLMKPKLAKPI  
ALSELDVFPKVKAGQ  
DAEVYNVPLDSQSDD  
DKLTLKIPWKNLYGE  
LSPTLNTPAPVAMPA  
TRSLGEEPVGGLGSL  
EEQVNSLPGSITKAG  
KVVIGFVPLAEIMGY  
TYIELMRPVSELIRS  
PDVEAHGPEWNLKMP  
YFPNRKFPSSSVAFK  
EGSRLSLPRLIDMSA  
PRLTPVRPAAASPIV  
PQPGLVVPVPTVRPL  
LLVTAMGPPGGGRND  
KIEKELKPYGSSAIN  
ENLELTNPQEFGSSW  
AVDKRFLPDDHGKNA  
PSAFSIVPRRAAKSS  
RLLSLSKIPILPQQDN  
IKRQCVWPFIVMMDD  
ANLHPAKPKDFSAFI  
TQITTESPEKTLFSS  
SDCCGQKPTGPGGPL  
ACVTACEPPKTCQDG  
TMATRTSPRLAAQKL  
ALTALTTPIQTAALQ  
KLQSILKPMMLRRLK  
RKKMNLKPIRMNGN  
EKAFEGSPARELDVP  
GSSGAGVPGGAAAAS  
SKQKKVAPRPSIPVK  
LPGSVLSPPPPPPLP  
GDSGGLIPGKSLVFA  
NKEEGARPGTLLGTF  
RRTEGQYPSICPRLE  
HEAILKPEAIEMYI  
HPFASFHPGLNPLER  
PDGLKLYPTLVIRGT  
PQRPASEPHVVPKAV  
EIPKKKVPEERKPVP  
RLFNDSSPVVLEESW  
GDRSGIFPSNYVKPK  
QAIIQIPKASNRT  
EKRDYREFFRKKDR  
FTNTSLHPQRMKALA  
PQFSSLQPPCFPPVQ

ACRCSIFPDLSFVTF  
LMDYADLPYQIEDIF  
FIDDINMPVINEWGD  
GTLVLCLPQIKIISA  
ISTSEAAPYAPPSGL  
TPSWLGLPNNAERVL  
DLEDESTPIVKLGDA  
EDVVASLPLCHAALR  
RTHTGERPFQCHSCG  
GNLHLLSPGNSARLT  
EAIIDVRPASTRFLP  
EMSDSNSPPIPYSQK  
DSVGVMSPPLSRSSV  
PRSVSRSPIRMSPAR  
NMVNGMGPMGTEGLF  
TNTSVLGPMGGGLTL  
TQGSEKCPQKTTRRD  
EESQHQQPDDSNIA  
FAGTEIDPENEELML  
KVTIKDKPAVAPATK  
NHDESLLPESLESMM  
QHLPSVSPSVSDAFL  
LNRDLSTPGLEKDSG  
CEELRAAPRQGPAPA  
PSKEEPSVKAEVAE  
NSSRQERPPVKPFIL  
GTEEKKKPSDFKKKV  
GGESSASPGEPQRTL  
QADRKILPFTSMRHQ  
RARTDEVPAAGSRSE  
RFEMEGLPVDES DSC  
LLSQLGQPSIFDTQK  
FDAEDGEPQTCKSMK  
AASLAELPLTPPPA  
ISDTLLPDLSQISP  
NRFTMEVPKKLTEWF  
TPESSLPVALQTPT  
ITESQSSPPPVIDLI  
PLLPSSEPPPAPPLD  
EMVSGFGPIYNYKDT  
VQVLKYEPFLDCALS  
LGRASVVPLPYERLL  
KKTGKGNPNSHPEPA  
ARNLFSVPGAPDKPT  
AKVMELLPTHAFSTL  
HAWAWGTPGFLTVML  
TTSQDEAPREELAVQ  
SYQEAQLPALPESVP  
IVEREMAPDFELDAE  
ATLEEGNPTDEVPST  
LLKPEADPRPCERAP  
PKKVAKSPAKAKAVK  
SRRRPRAPKEKAQPL  
IPMLYVVPRPGKAAF  
PMNPIPAPLPPDIPS  
GNDSDEEPPAAAPT  
DKVVIQDPYRLPGPP  
FAKSDNQPSTEKAME  
IAKEKRTPAPEPEPC  
SAKITSLPPPPPTLF

LHLQRINPTTVKMKS  
LDIKAKAPKVKMPDV  
ESGDAPRPPPAATPP  
VDLHRFHPEPYGLED  
RRMQQAAPTDPLPP  
KAVSSADPRAPGESP  
TIELEWEPPAFNGGG  
XXMNTSIPYQQNPYN  
GALMTLGPSVVRYHL  
VTFKANRPFLVFIRE  
VKVAQRSPVDSGTL  
PMKPLLLQPEVLS  
NLVLKRVSPVLIKK  
MDDLISPGKNKSGR  
PRESACLPEKLKEKE  
RAWGCAGPCGRAVFL  
NWRQPELPEVIAMLG  
MDRDCRMPMGLSTGI  
TVENASKPDFTKNSQ  
RTDLYFMPLAGSKLA  
DRGLQLVPVWDIILS  
NALNSCDPWVQAKCY  
TNMGIIIPDFARSGV  
SKTIYTAPLDMLQVT  
RTPPRRMPPPPRHRR  
XXXXXMHPPKTPSGA  
YYRQSEVPDSVYQHL  
EKDDSVRPNMTLKAM  
ECLGAAVPARLRKVA  
RSLQKDFPIQILSID  
VSDVAKPNQACIST  
SLKKAKKPPPLPSRT  
EKFRIELPDLGRFYK  
AARISTSPIRSVRSP  
AFPDGHLPEEALKVS  
ETYTEEDPEGAMSVV  
ALDDAEEPESPPPPP  
ECTTIEHPFCMYDAD  
GAAGSMSPSRVEANV  
EDVQVLIPFKGRPPP  
EKVSEVLPIQKNDEE  
LKFSSMAPDLRLNE  
HPQRPPSPHPPPHPS  
NRLCFLEPTSNAQNV  
TDEILLNPNNKWFKP  
GKLSNWEPKDDAMSE  
GSGTDMEPSLYRCSN  
FKSDGIIPFAHAIWH  
DMLKRVEPLRNELQK  
FGYIKIIPFYILNAT  
GESKQHIPEKKNEVH  
ATLSVLEPATIVEKP  
LQGGNKSPVTLTAYI  
DIIQVTVDPSPSTSE  
ALGNQSTPAPPTGEV  
FTNFMRSACDIFNP  
PDVSMVDPEALAIEQ  
TSLFSNKPFLKLGAV  
LLCGSDLPLHKMAIQ  
CTVLTLEPNSQVQQR

YNGKLTGPAAVELKR  
GDASIAAPFTSKLSS  
IRDWLVKPIRDQHVK  
SQVFIDHPVHLKFNV  
AEDVSGMPALCSPIS  
NHARLRTPPPPLSHA  
LSHTLGDPIKIRAWQ  
FQELSQTPGHTEELA  
LGRPPSAPADKDGSK  
GFLSYLGPFNQIFRN  
ESQGEVQPNFSTSSE  
LMLTAGLPELTSVKD  
RPGPHSVPSQAPRLE  
ILDEFYGPEKSLQPI  
KIINFKTPEDARWIL  
DREDQEAPDSDAEVD  
KQNGIPHRGSTAIF  
AGQVAVLPEVQVTQN  
LAELLRGPCGSFDVR  
KAKKRRLPRGFPPSA  
LQRAFPAPAACQCHC  
VTRQLYEPLVMQLIH  
EWFLRTFPDPTSWYS  
NPKAITAPQMFGRLD  
KLNQHDSPRIKALEK  
MMLCSECPTVFVDAE  
ILKKYGIPFSRITQE  
EKTAAPSPSLLYKST  
AECWRSRPEERPTFE  
TLTYTAKPVGGIGGG  
VTSSQVQPVTIQQQV  
CQTSTVFPLKKKVISI  
RTVKDSTPSSLDSDP  
QVTDANDPPAFHPQS  
LADTDLSPMDGISTC  
EADASGLPHKLGEED  
KKIIEQPQPSGKQE  
DCFSEEAPDATKHKL  
SGQRSASPSVPGPTK  
KTVKLKSPVLSNTTT  
QKSLSLSPGKXXXXXX  
FVASGMGPSASSHGS  
LGCTAATPPSKDPRQ  
QWIRNLVPEFGVSSS  
MRKFSLDPQVHTVLV  
DRSLESNPEQLQAMR  
VASSEAKPAATIRIV  
DLQVRACPFLPVKRK  
ESVHGTAPDIAGKDM  
XXXXXMVPGEENQLV  
FLRMSKVPTDLAVEE  
DFLKRRLPKLSKSTA  
QECKTKHPHLSLKE  
VLKFSCKPGFTIVGP  
RLEVELYPSEVVEIQ  
TTKSSAVPPGLPVYL  
QLYDDSFPMERQYL  
KKDTKKYPESTDTES  
SHGDVIRPLRKQVEL  
ESGLMGEPQPQGPPS

GHETEEFPDEEQLRR  
GDSRGPSPSYLGGPR  
ESRYQTLPGRGLSGS  
DNANSRLPEDTTSVL  
KAAYLSDPRAPPCEY  
IGFLDNWPLLEQWFS  
LFQKKIDPVTMDPEK  
SVAQTGGPPEADGLV  
EMEVCKLPRLSLNGV  
SVQSSHFPSGSYSVR  
ITEVWGIPSPIDTVF  
SAQDMHVPVPKQLAH  
SKDIPLSPPAQKNDP  
YRGVKVMPFSTACNT  
YQEKLYRPPPVLDAL  
PAGPTESPASKGVTA  
WVRCNKMPVKDTTYR  
EKECAPTPAPVTRAK  
RHAVKGDQPSPGRHW  
TASLLAIPHTPESSS  
VEAFFYEPYQGAIQG  
FMAVKNWPWMRLFFK  
ENYVQETPLVLSRCS  
MTISWHEPLSDGGSP  
SAEKNQRPRKQTSAP  
FAASSTVPHCEQSCR  
VATPQVSPNTVKRAG  
EEDLLDDPSLEGMCG  
ASYESES PENQTEKE  
WQMWTL LPGFCTRPT  
RQLDRLLPKLARGSL  
GKKVRKMPVSYLGSK  
ICHEISEPRLQNYDE  
IVDVLDPGPVGT  
PFKKS RFWEPNKVSSNS  
QRFCIGHPTQEMTFG  
RARSLKFPGLISGCT  
LIKEQLEPPEIDMKN  
HSDSGYEPSFGKSSR  
GLAWARAPQPKAWVS  
ASSVETKPGASKVAT  
LIRICKP VVLPKGP  
AKKEDKTPIKKEEK  
PKASIKDPHFLNFK  
MTMMSHIPSVMKAHG  
ISELTGTPFDVESDS  
DYALLTLPAEFSSQL  
GATAPPAPAEPTPPP  
EYGGKWSPLILNPSY  
EGKSLRFPLALEEKQ  
NRFGVSKPLESAPII  
PQLSVCNPHSGKEYF  
SNRKGETPLKVANSP  
YGIWKLIPNGQYEF  
RGGAEERPGTPELAP  
APLNVPPEVPSEEL  
ELVQAMFPKLNNQER  
GTELSLNPTCAV  
FITKVFEEAKPNSEL  
CCKVTS AISLPNIRK  
PDG

CDEDHQTPRDGETSH  
VNYCECNPCFNNGSC  
AFYQQTLPNSHLTEE  
VYIESRRPNTPYFIC  
YLAQQIHPVVARICE  
VEDKSDPPEGSEEEAA  
XXXMTAEPMSSEKLN  
KSVHLQKPKPKKKKF  
ADSVSLLPAAPEGSR  
GCEGSSKPFYNRQD  
RRREQRDPTVHDDVL  
LDGEEEEPEEETTLG  
SGIRAGYPLSERQQV  
MKRESQNPDKDETN  
NKVGASDPSDSSDPQ  
MKVVTLKPTVLEHTV  
ITPKSDVPIQAPHFK  
ENLKIDRPEDAGEKE  
ISDHSETPNMELSCR  
SCSENQEPGYCTVSN  
SFIKQNNPKFSAVQD  
PEDDGGSPITNYVIE  
TLVSGSLPFDGQNLK  
LARYSYNPFEGPNEN  
PASTRFLPQGTRIAA  
LHEIYFLPDHPELKK  
LNRMTFPEELDMST  
GRIFVFEPPIGVKAN  
QSKLYHLPPPTVGPH  
IKNSNGIPKLKYIPL  
FLEVDEYPEHIKNLV  
QETAEGIPPGSQDSS  
XXXXMSEPGGGGGED  
VYCLALVPANTLPKT  
RCFLEADPYIDIDQN  
ASLEVEVPAKIHLPK  
KKVPAPVPKKEKVP  
QVFKPFLPSIALCM  
YSVYGTEPYIRLGVL  
MSPARMSPARMSPGR  
PVPEEKEPASSPWAS  
KKTFFVGEPQRLGSET  
KDMVKMFLLVEKLR  
LGAMSAAPSQPNSQI  
TDRLVITPLTDRCYI  
SLRQNETPQAAQRS  
LSKDLLKPIQDVNSL  
TASPSSRPVSPGAI  
KSQVRDYPKHNGQIS  
GKDVLRRLPPSSITD  
GLETYLGPLQVAYRE  
REYQEYNPYEVLNLD  
RVELLHNPAFCSLAT  
SVVSITGPLIRILGD  
PEQNQDMPPHLPTAS  
RLTPIGDPTMVVEWL  
TCRDEYAPPKAELDA  
GDEDIKIPENPLEPL  
GEIRSVRPLDREKVS  
LSPPPTEPTDGEQAG

KKELKVGPYANTTRY  
GKDELSKPSSDAESR  
ATLVDQSPESLKRKS  
KLKVLDPGPPASVK  
CTDSMGVPRALGETW  
ANGDSGSPSYMSSLS  
LGRVFIHPESPSTGH  
SLKTAHSPNVFLQQG  
DKIQMNPPEFEMIE  
ALLKDQQPGTFLLRF  
AVGTSAAPVPSDNHX  
EVKISHFPAADLGFS  
CVDGCYCPNGLIFED  
EGVLLTLPRQSGGSG  
ESMENSQPQVTEVTA  
SSSGAVDPSVQRSFT  
XXMMAQFPTAMNGGP  
EEVRVRSPTRSPSVK  
CLEENERPLEDQLEN  
SSSSGISPDNRDFYQ  
ATSTSSEPLSSNQPA  
TTCNCKKPDDDTRKG  
MLTGESVPQMKEPIE  
VPGGSVKPKIMSPEK  
ILTTLQEPHDKHLLD  
TNVEDVCPNIPSLEK  
RLEYLEGPTVTSSYR  
QSPTKAKPKVEDEAP  
PPPSTQAPSVNGVCT  
HGDACFLPEECPCTW  
EVSIGSAPLAKQQSY  
NILVELDPDGCPWL  
DDTERRSPTPERTRP  
GSFGYKKPPPATGTA  
XXXXXMAPVHGDDSL  
APQQEELPLSSDMVE  
KKLRSDEPLIDPKPV  
AFTRTVSPGSVSPH  
QLELADPLKDELNL  
TPNPLERPIKMGWLK  
FKELFQTPGHTEELV  
EASKEYSPCVAPCGR  
KSFATGRPKKTKKRS  
HPYVTHIPSPTLPGS  
DAWLQTDPEIQSPF  
SEIKISNPTEFQNH  
HNIENASPATVSRMG  
SLESSFPLPKQYLD  
TGQLGVKQGTGNSIP  
CSPLMADPLLAGDAF  
FVYKDIKGRKRKKH  
TSANEVSPVSSSGVT  
FQRSRSESPDAPES  
ADSDGWTPLHCAASC  
VEENNASPHFEPDLH  
NQIGCLPELSELKK  
ETQAEDHPPRLYGCS  
FKISFGTPAPGFSSM  
GVCTDGEPSPQLLGQ  
LSPDSHYPLEEEKTD

SPISQRLPPKVESLE  
AAEFISKQNLEILE  
NKCLIKNPAERADLK  
ELVAAVWPYRRLALL  
RQTVAQMPPQLVELP  
NPALTLWPMFLQGKD  
QDIAKDFPRGEESLE  
VTLKWAKPEYTGDFK  
QHVFSAGPVSDEVLP  
LYPPGRSPLHHAQQL  
HLSSKWLPSSPSGVA  
QLAPDPGPAGHTLFQ  
GLCAALEPILSAKTK  
PADVTGLPMPKIEWS  
QKFRFNHPAEAAVLR  
SAMEMNEPQAPAPSL  
FHKVKALPLVSWRR  
AFKRANDPVNYLESK  
VRATRASDPDPRAYVP  
KVIKMEEPLPAKVTE  
QQVTAEIPVDLNTRE  
GKVIGEFPGVVHCLD  
MIKKQDQPTFDNSGN  
SASDGYCPREHMLPC  
LKHSPEDPEKYSCFA  
LIKHLPLWWDGCI  
SSSLGKKPSLTSESS  
GILKRRYPNSLPALI  
SKRQLQTPKEKAQAL  
VYVDYPGPASLTQIY  
AEEDLTDPVRCNSLE  
NSAGRSAPRESRPVI  
FQEFLLKRPDHLKQDFV  
QAESQVEPSYSEQAD  
LTAKQKLPSYILENN  
RSTEGIVPQYDGSSS  
LSLSLAQPLRSERSG  
EMKEIERPFETYKEN  
NATSAFGPNLRYIVK  
VDQKIEHPLQPQGL  
HRRTSAIPRAFTRE  
GDFKVTTPDTSTTQH  
VISRTGVPQPTQAQS  
RGKKAKNPKEEKPK  
YTLKKDVPDGVKELS  
GNNDVKQPEGTMID  
VESEIKVPDVELKSA  
KLGVQVRPENWCSQM  
SWLKDDEPLYIGNRM  
PAYDGGSPIIGYLVE  
LAKILQNPITHSLQV  
KLSSQALPSFGYIKI  
PPARQLGPRSPRVGR  
SKVWYNCPPXXXXXX  
GKDFERKPLEMNDP  
GQAVTLLPFFTSLTG  
KLAHQEPWTTDAKI  
PGGKEEAEPPDGGD  
QMHSTSDPSHRSSSP  
LKNKGIQPLLDVMTM

SNIDIRIPTGQLTMI  
CDEFHETPSGSYWDH  
IDKNTKIPCKSPPE  
NAWERRAPLAPKHIK  
TDWEKTKPVTGNLRP  
CYHFGLSPDLPICKE  
EALVIREPITVPERP  
GDMGDTTTPAEPPTPE  
FVRPDLGPKMYNAYG  
DQKYRQHPSNFQFKK  
QMSFSQSPFLSIKAS  
FSALRALPDMEVVGL  
TSPEGVAPTSGHDRR  
GSHVNQGPLHLGGIY  
GRITDVIPSEAINEL  
VAEYEVTPDDKRKAC  
LVRDPLSPAVRQKET  
GNICVYCPGGPDSDF  
RLLERYIPKHQKCLT  
PLTTALNPPVTATEE  
FLTYHMMWPLTFLSPS  
GHGIMEEPELTLIST  
KLDSEAWPGVLDSEK  
LRISLTHPTIPFNLK  
ENSIEGTPSKCYCRL  
NESKKTAPRQEAIPD  
INPSTSLPLIGSPPV  
QHRTFIKPKLEGLP  
RVRVVGKPDPECEWY  
LQALDLLPLLIQTVE  
WAQQIHSPLTCEQLT  
ITVITLGPPSKPKGP  
AWDSGQGPRLPSSVA  
STIGLNQPSTPTHAA  
GEYDVTMPKVESEIK  
FKTSIFSPMKKEVKT  
DEREFSGPSTPTGTL  
GDEGADEPRGAGRKA  
STSKNTSPMRNSFAH  
LRPHVFMPEVTPDMD  
VDLSLGSPKLGDIK  
LLVGAKSPNLPEHIL  
ILDGLYGPIAFKDFI  
ARHRCQTPHLLAAXX  
AAAARTEPYCAICTL  
LFHILVTPLFLLSTV  
AQILILEPPYFVKQL  
PPPGQLDPEDQDSEE  
CLVKDYFPEPVTVSW  
TPELSAETPKALEN  
TAALAVAPGPRFLVT  
GRPAEPQPEPEEPAE  
DLRTDAIPIRAATAA  
AGIAAIGPAKELEAE  
EEITDNYPQAIVYPF  
APPGLQPPAEDEARA  
LVIPPQPPTTGPPRK  
SRGTDGQPLLLPYKP  
KVDALHCPPAAVVTV  
TMKMRILPDQFSPLN

QVTTVKVPMMKRLGM  
KKACMFEPLPIKLSK  
RQONTRDPDTMVPLT  
EEALKVSPVSIPAEQ  
IWWANKDPLPPLDPQ  
ELKLESEPEPGRSPE  
MMGLDLQPDLCSLLI  
TRLFVKEPAAFLKRL  
FDMHKRSPLLRAPRF  
ALGRTYHPKCFVCSL  
QESARAVPEKSTAPL  
VVLCNLKPQKMRGVE  
DASSSWGPMQMSASVH  
AGVSSGAPPGRNSFY  
PSASERLPDEKVELF  
TVSQFTLPKSVSDGI  
TNSKATTPKPQKPTK  
KESKVEEPRKRETVS  
ALSSVGSPKAKEALN  
EGQTQRQPGSPMYRR  
KKPKTVKPKKVAKSP  
AAVRGSEPISVTWMK  
QFPFADTPDTYKSEA  
LAQADKLPMTDKRVA  
XXXXXMDPPRPALLA  
PEVRSTEPVAPPEQL  
EDEAPPRPPLPELYS  
EKPVDPPPFMFKPVK  
IQTDVVLPSCKKKAP  
ALSLFTVPEDCPIGQ  
SQPRDGWPMMLRIPE  
EGGGRSLPRSSLEHG  
TLSISVQPGEGNKAA  
TKSNDTLPSSHREIP  
ASAEGREPSQCGGS  
SGGEWKGPQVSSALN  
YTHIQMPRGNHFTI  
PGQHLLAPEDVISCC  
SLCVNEVPSFYVPMV  
KGVTSILPVLREGVL  
EQQAQFTPLADPPDI  
IPLLLPTPEEKKPPP  
PPTLSRTPEVQSRVP  
TDQKDSKPPEKATED  
EAMGLGTPSEAIEIT  
IKTLSDVPAPRRLAE  
TLLELLPWALLINE  
RIEEGERPDRAKGYD  
WARVTKDPIHPYTKF  
KLLVNFDPKILEVVR  
ESKQATTPASRKSSK  
LVKMKFLPVDDNFSL  
NIETSNFPKLLLALF  
HLDFLKQPLATQKDL  
LNKLSMKPEPLFRSV  
KDKIHHTTPDTPEIRQ  
DAAHGYSRAIDMSN  
KTKEKAQPLEDLAGL  
ECQITGTPKIRVSWY  
FGTLEVMPQNESETQ

ESEKSDFPPTVAEV  
FVNKADFPKVRAKEQ  
SGQLVVIPSDHLPHF  
ATGRPWLPLHTLSVS  
ADLGVSGPKVDIDVP  
WKQVHNYPMFNLLMD  
PPCLQQNPGTMQGVY  
GSAGPVHPLVDPLTA  
AHLFSWIPLSASITP  
LKWNFTTPRDEYIEQ  
VKKTDSQPTSVMLLD  
EGCANRLPNGHVNFE  
RGGKKFLPVLKEILD  
STCSSTFPEELSPPS  
RSKLEDDPLYTSYSS  
SVVSQRFQNSIGAV  
SLLALGSPMYSIITP  
ASKGEMSPMVVETLK  
HCLSFTIPRLPSSEE  
IDKTCLSPTPTLEQH  
TIFQERDPANIKWGD  
NTDGLFFPVMSFSAG  
KADIGCTPGSGKNYA  
MTSTSLSPQGISTLE  
KTVGVWSPSPPTCER  
PRERSMWPLRKCPWK  
VDYASKIPAQGGTNI  
NRLCFLEPTSEAKKI  
ETERCLQPLQMMALH  
AVRMKIRPLVGQXXX  
TLVVKGDPRDNRQPA  
LLRRIEHPTAGNIEA  
HVLLTLKPYAKPYE  
DEEVLTDPKIQALLL  
LISDTKAPKRQEMES  
SSVTFEYPSNAVEDV  
TSSWLVTPKSLGNVN  
KVYDRYIPDLCVCN  
CWYSQWTPAAPQCKA  
SNGYKPAPLDLSDVK  
LGVAEGSPQYKKWYF  
IALTKLQPLLNKDSP  
DTWVEHWPEAEQCQD  
GYLAATYPAVGQTSP  
GGEFEMMPLGVNKSP  
LSAEAACPMFNFSIR  
YLCSAVLPLLTRCAP  
MDVSLHLPSRSSPTV  
TIEELKEPEKNGIST  
AIDRFNAPGAQQFCF  
GGFQVLLPLVDQYFT  
ILLTDGEPTVGETNP  
KMLSGFIPLKPTVKK  
EELTYSPYGREKDV  
SLKFKEKPTDLETRS  
DLGQGLMPVLEAWKA  
SRLANRAPEPPPQQV  
RTKKEGIPDARQATR  
GCKEICCPVPDPKSV  
FSHIDVSPGSAQVKA

IILLILCPEIIQDIS  
KAHIQFKPTLSQQRK  
MGNCGHKPEPTEVE  
EKASKEAPVKGLLQT  
LKNLLFNPSKPFSSRG  
RGGKGISPPSFSSYL  
SRTQWEKPQVKESKR  
NSALDWWPKIDAVYC  
GVQREDVPAADLSDQ  
YRDRSFSPGSYERET  
KVNSGAFPAPIEKSI  
AIMRYGMPPQDAFTT  
KEVKSTAPEATVECA  
SEGNIDSPVSRFMDR  
TLGEKAKPALDDLQ  
GAAFSQKQPQSNALIG  
SNQAELLPSKSVSLI  
LRNDKDKPLPPLAR  
EKSLSHSPGKXXXXX  
GYYCLKVPLVVKRE  
FYQEVANPLLSSVTF  
ALLESLPDTDPVVS  
EKCLAGQPKDTMRLD  
GTSKAGNPIFYVAR  
YSRIKYDPLFRMAL  
TQKTVDGPGSKLWRD  
EAERSGIPVTSPYQ  
TNLKIKHPTYCYEMN  
YAAFNNRPPSTWLTA  
ICLAQNSPSTFHYVL

**Supporting Information S3: The benchmark dataset used  $\mathbb{S}_\xi(\mathbf{R})$  to train and test the model for predicting the possibility of carbonylation at Arg site.** It contains 136 positive samples and 847 negative samples. None of the sequences included has pairwise  $\geq 30\%$  sequence identity with any other in a same subset. See the main text for further explanation.

(1) List of the 136 peptide samples in the positive subset  $\mathbb{S}_\xi^+(\mathbf{R})$

ASKLSKIRVVRKSIA  
IIIQSYRMHVQKK  
HCKAFKIRKHYLHLR  
IHLELRNRTPAAVRE  
LEELDRERCFLNEI  
YEMHKMTRDPLNLAL  
RPPVSGLRRRKPRAT  
KTQRSPVRIPFMQRP  
KQFFKDWRDKDQSDG  
KSEYKSYRLRAQLYK  
KSRDEGPRLGDAKLL  
SLRKLPPRSEISSEK  
RKSTEFPRKIREQEP  
GSVTGTKRLRCMPAP  
ELQDMAARQQQIEN  
RKLANAPRPLKKRSS  
ASSRAHRRHRRQAVF  
RALLTAPRSLRRSSC  
TMLLPLLRFPQVR  
SIDSLKQRLNAVKE

EADEEKERILAQLRE  
VADLEKQRDCSQDLL  
EEEEELRLHQKEQ  
IELLRKVREQVLKCP  
LLAEVERRIRRGHAR  
PDGENRARFLPGKDL  
WERKQNLRPMPKKYH  
RVLSGRWRLPLRALP  
VSWGKLRKRVKGWAP  
TLPKRVPRAGEARNL  
EGGHFKLRVTISSNN  
TLVEKEMRVTLAKLL  
GDSRLKMRAELGEYI  
REQEPTERPLKGIQS  
ALAKHKERKMAVPMP  
KDLGLHPRAVSTSG  
CLEVVLCRVEGMTEL  
IKGLTYLREKHKIMH  
MQKLNQKRAELKLVV  
RIPQLWKRVSWDSST  
GYKRKVMRMLKRQVS  
ALVPPWTRVYRVQRD  
KCSEETFRFELGGGV  
GAGSGLGRLLALQFA  
SQDKMEIRSCLPKLL  
VDKSGVVRVVEGDN  
KERLQEVDRKGLQY  
YVGKAATRLSILSLL  
RSVFTVMRRQLEQA  
QRGLTEKREELLSVP  
RKQLIPRHTKTREK  
LLEAEKERNKLSLQ  
STEPLPGRKQVRDTL  
RQLAIETRKTAAQT  
LSHPKIPRCQERLLR  
RDRPGDPRRKRSSDG  
FKDITDMKRLSMEIEK  
LKRSLMRERVLGPD  
DRGHEELRKLESTLD  
SGILRQLRQTVEATN  
TAEDLRTRKSKLQEL  
KAAAADGRGMLPKRA  
PPSAASSRYSMRNRI  
SRSYTRSRLASSHS  
HIAQKLFRDGHFNPE  
ETSLNKAREHLLRS  
HVTKTRRRCKTVRVD  
RLSSVFLRVRTNVGV  
GQDGSRRGPQKRGV  
PRVFPPRRPHTPAER  
APYVTLRRGLNAESS  
TSQGKLLRTILFGVK  
IYKPKRGRPKSKEMP  
ENELTFLRSQIAAIV  
IANVFQNRDYQCDTV  
LMEFITSRKRGPLWN  
VVRPKDRRVGTSPSQ  
RRSVRMKRPSSVKSL  
PKTMPRVKPKTTPT  
HFHTVIARRAGMAAS

RIKNPKARVTEVMKA  
LFTQELARRLKGSGV  
WDATEDLRISRTDSF  
ELIRLTQRLRFHKVK  
LPLVSWRRLEFQGE  
FLQVETRRAGERLGW  
LSYRSLRRRVRLRR  
VGLGLPNRLRFFRQS  
GLAARLQRQFVVRAW  
SLRKGIPRTKSVGED  
ETRQLLRTVKKEVK  
AIVRQRERESHAAAL  
ASPWKSARLMVHTVA  
LGKRADQRKAKLGDS  
IKSMAASRRAKLNES  
QRMKALARALPLQPR  
SASKASVRSISVEDK  
EEELLNVRRELMVSF  
AQLNIKERLIPPSFT  
SDPIKACRPIKPPGP  
HHVVSGLRENEYFF  
VVESVLRAKEVTWY  
LKRTKKPRPPSLKKK  
KESLLQDRRQEEDQR  
QEERLEQRLKREEVE  
PEKENAVRDNKVYCK  
EKLHLITRNLQEVLG  
HGKQPSLRAAKEHAM  
NCILDDKRPHVKKAT  
NRRTLLVRPISKQDP  
QADNPLGRSVLRKDI  
GPPTGAGRGPQLQA  
KVLKNNIRFMNHMKH  
SRLSRHRRAVHGPPE  
LAPLNDTRVVHAAKA  
YCDLPEPRKPLEKAV  
CALSHHERLKCDEWS  
VKVPMMKRLGMFNIQ  
YQLEGNKRITCRNGQ  
HKSEVAHRFKDLGEE  
LPKLDELDEGKASS  
SLQKFGERAFKAWAV  
EKTPVSDRVTKCCTE  
CTLSEKERQIKKQTA  
PLPKEPPRKDPPPKD  
XXXXXXERIDGGITG  
RGGEGNARTHGTPDL  
VLGNDGHREVVEV  
RGADYSLRAVRMKIR  
QQARLHERGAAEMVL  
LPKIETMREKVLTS  
CTKPESERMPCTEDY  
YLSLILNRLCVLHEK  
TESLVNRRPCFSALT  
VGVNGFGRIGRLVTR  
AITIFQERDPANIKW

(2) List of the 847 peptide samples in the negative subset  $\mathbb{S}_{\xi}^{-}(\mathbf{R})$

VTPHTQCRLKLLKLE

VLSFSETRAHQVVQQ  
ELSKANSRFATTFYQ  
EEAAGSDRASDLDSV  
GSNGVDHRSYRIIRG  
HSGASQHRIARPSRQ  
DSLLGKNRKALAKGL  
IVDEVHERDVNTDFL  
SDVEAHFRAAHENTK  
ELFVKGVREVDYDYC  
HASCYGIRPELVNEG  
ASPATVSRMGMVYIS  
RVQRLGERVVDSGRS  
RSLSRFERSARFDIF  
PNTYDIHRLEKILKA  
EKPGGKERGSSASHP  
VTEASPWRATNPFLN  
KKKKKKGRMKKEDNI  
GEPKDVIRKDVRAIL  
PHQLLLQRLQEEKDR  
LSLSHFCSRPFCLFG  
TTEAPVKRASLLGDM  
QEECGYLRRHHQEEV  
VSNTLESRLDLIAQQ  
KKKMTKARLERFKLR  
VYTTKSPRERAILGL  
PASPISQRLPPKVES  
GAQMEAARPLVQENP  
TKDNEHKRSLTKTPA  
LHVTDAGRKHIAIAW  
INYVLESRLIGTEKF  
SSASLIWRSEAEASV  
KFTTEEKRFVESRDV  
EGEQYLFRIRAQNEK  
PPIYTAAREQTPFRH  
IRGNEAGRFRDLITL  
EWDKDVARKLGSTTV  
TDDSGTYRAVCTNYK  
ESKGPMTRRLLLHEV  
LDLKETLRLRILSED  
DELLRHHRDEQKPAT  
ALNMLTWRAEQEGGM  
PSSGLKKRPISRLQT  
CVIQSYWRMRQDRVR  
DVWIDVQRRWVYLEG  
WLLAHCGRPQTECRH  
AACVMPSRLKALGTL  
HKQTKKRILIPSDI  
SIQDWAKRMKALVEQ  
QENCILLRLDNELGG  
SQFNLSGRNPQKQAR  
KSMSIVLRENHQKPE  
LPEEIALRASDGPQL  
EIEKLEFRVRELEQA  
EKQVELYRNGQRILLE  
AKKPAATRKSSKNPK  
EGQEYSFRVRAVNKA  
SISGCKMRLSYLSSR  
RFRTLMMRRRFLSLK  
TYDSYYSRSRSRSRS  
EKETLLQRLTEVEQE

HWGQQQIRPIKSVIP  
AVPPAKGRTVLEEKV  
DLSTIQERMEELKGQ  
SECGFCLRQFPRSLL  
TPSEAHSRIFESVTL  
RIQVFLARYSYNPF  
KREKEVARKLEFDGL  
PLKTDIPRHPMPFAA  
CYIFPGGRGDSALFA  
RDMEKVERQAVPQAN  
LDLDELKRGIVVRA  
SNQSVLHRWERKQNL  
ECSKTSFRVANLEEG  
MSTIEPHRQVAWKRA  
YKDKRELRSKGYKI  
LEAQLPRFQPRVLQ  
SPQPPLSRAEAIKQV  
ELEAHLCRMMKHSMD  
EKKLEDARARCEGQE  
TYSSAEERMQSEQIR  
GLELSIDRFRLRKKT  
SEIRITHRSHHFIPR  
CSKDELERALHYLKN  
HFIPITIGRLRKRAGK  
KQLPQVPRPLQLFSA  
CEPLSNKRNSNSVTN  
HVHEASSRSHAFIT  
KNPASSKRRLKTSLG  
GPKLEALRAEVSKLE  
WICKCVRCKSCGST  
NCVSGQERGLGVL  
KLNEMERQRTEIAR  
NYSESLYRQAMEEAK  
LAMLAKERLQEVDRK  
EEKQEEERSKVDDL  
SEPGANMRHIRKPI  
HVEAVYSRRCVSFIL  
QNQVGIGRPAELKEA  
IHYLMLPRVREELID  
YGLITHQRIHTGKPK  
TGLETPDRKGGKTTE  
KVVPPSMRRIRAQKG  
RRELLELRRKGREEK  
PLGLILNRFSADTNI  
GNLSILSRQESSFFT  
IQGKDVLRRLPSSIT  
LNTSIDLRTNVLNDA  
EKTINQQRIHARIGQ  
KAKEQETRISEEITK  
VLIPFKGRPPPTVTW  
MALEETLRQYQAAKS  
PGFKGEGREVDVNLP  
RDLLLQTRLVNHVSS  
DNKKKKQRTSSKKKA  
WDDIITNRCFFLSKI  
RKTRSARRRTQIIN  
YIRISPTRAYNRPTL  
LEEELPKRVRSRLSL  
QLKSFPARLRQYASY  
STGLLPGRGPGTSAP

VKAGDSSRLECKIAG  
ATEISTERDLGQCDR  
CREVGLQRRSVQLFC  
EFKQKLCRAEQAFQA  
KVNGCLGRNCKLPIT  
HQAAAATREASSED  
GAQMLAMRGEQLGVV  
TEGMDDFRYACQSPE  
IKKANMKRENKAYSF  
FSCQRRTRFISLGEA  
NSIEASLRCSVVPR  
ALTDEESRKNWEEFG  
EEKPEEERSAEESKP  
SQELDVKRREAIYND  
EKKSkkIRDKTSKKK  
DVFLDSGRKTRSARR  
KIDHELHRLQALLKH  
LCPEGVHRFQWIRNL  
QDQKVNIRVAVLPCS  
GATTSTIRSSCLVGC  
APMTPAARPEDYEA  
KNLVQKEREELEEQEK  
QFGGIDQRKIFTFAE  
QERDRKFRLEEQKVR  
VVLPLDERAFEKTLT  
ALAVEGKRIGKVLDH  
EFLELKYRLLSLLVL  
AKWFKDGRELSADSK  
RVRPLSKRETKEGGR  
IDVNVIARPSAPKEL  
EAYITATRQYVAQAN  
AQSEAAGRTEPTGPK  
CYFHSGPRGTHDLWD  
VNLVSVGRVLWQWTK  
ALHTEITRNKDSTLE  
LQVNDHVRKVTDQIS  
VTLQSAYRGMKVRKR  
IVTEEHLRRAIGNIE  
CPGMMLWRYPEPRVL  
EDVHIKGRIIDTVAQ  
ELVPPSFRGGKQIDS  
KLQTAIHRVTLAQTA  
VHSPDIYRVVVEGER  
DIANVMQRLQDEQEI  
KFVGDATRLTDKLE  
GLTNPSLRSPEESTE  
KGNEIVLRQDIMPTT  
RSRSGKGRGLPKKGG  
SGAGCSSRDPGPPEP  
LEKIKAKRSDSGKYC  
KFSSKYLRTHEGSEM  
SKSIEKKRGRPPTFP  
RKVFSPIRSEPRSPS  
WYNVENWRTAVTSPD  
HRLIAKSRELYEKTE  
GLLFYSLRTLTTMAP  
ESDSFCLRNIMEAPL  
VKEVAAWRERYEDSQ  
KLGKVNDRWQHLLDL  
LGYWLEKREVNSTHW

ERDYLLERRDLAVDF  
IIDEGLKRFIIEITF  
AEAAHNQRAGAPGIQ  
TSVPTTTPRATPILQP  
PLDQTLPRQGPGQSL  
IKALADEREAVQKKT  
LINGGSERKSCFWKL  
VADLGNIRIRFIRKN  
AKISDLHRESVDHLT  
EDVTFNKRRMKLEED  
KKQQQCRPSISISS  
PKVLQDYRKLKNTAE  
IKKLEPSRIVKQDEF  
GKPKVLARTKGSMLV  
AWIPVPARREAEKVP  
SLDWLISRLEAS  
RLKAQEHRAEMEEKG  
DEAKTSARDAALAYH  
PTRRSSARRSQAGVS  
LYYYNFTRTVISSGG  
DTQTIWARTGYLGFL  
NELAYFKRENQELMI  
ETQIDETRMGYKPA  
ALFPKGSRSVVPRDT  
EVFTYSVRGLYENHK  
PRARPRERDPGRRPH  
NAALDNLKVVPCYS  
ESTSQIERPLSQEPA  
YDGPKNVRSDISDQE  
PFTPVPPRGEPVTVY  
MKKFEESRAELEKVL  
GTIDGEVRLTGELDR  
SETKDPLRVQPHLKK  
LMVHVDKRITLAAFK  
FFAKLNCRLYRKANK  
QKVAEQERTAQQLRA  
SEILSNIRSCRLQCF  
PLPTVNERDTENHTS  
EQEQLYLRSGVVSSA  
AVVDVSDRAVPPSFT  
LEYCEVQRPYSNYG  
EDISKLNRAAKVVQE  
QGETNKNRTKGGWQQ  
EFITSRKRGPLWNHE  
DMSMLEERIKRSKR  
AKQFRAVRTTEGEEE  
VKERESERNQC�FKP  
DKINKTYRSQLSSEE  
EGVKYQFRAMAINAA  
GPPASNLRKQKSLTN  
DVLLGASRTLSLALD  
EEVMHTPRTPSCSAD  
PGLPVEVRGSNGAFY  
PGSTVLYRIFTVNHK  
AQGALPERDASRGGL  
PVWAAKQRVLCALNH  
LEKRQMDRAEHKGEL  
ITESDAQRTMYPGSC  
ETPSYAKRRRLAGPS  
EDEVQFLRTDDEVVL

AVVLTSYRSTAERKL  
RSEGEKVRVGDDLIL  
LHNSLLQRKSKLQSL  
GWWVRNTRILRKIE  
LLANAPERVVERRRR  
RNGPAQTRVSSSSSH  
SVQLTEKRMDKVGKY  
EDTWKLGRNWGQSVE  
SWIWWQLRTGLARDG  
HCFHMCDRMVYFFI  
STPSLTSRKIHGLSH  
QSVAKMFRAVEEGLT  
LSVKDAVRVDSGNYI  
KIYNIEDRTRVPNKF  
DADLEALRRKLANAP  
NFLASKHRQPPEYNP  
CEPNCYSRVINIDGQ  
PPEPVDKRAKAPKAR  
NKPIPALRVVEEKKK  
SKLLKNWRDLARIT  
IRNGVTKRGETLSWL  
YTMESTDRNQTFSE  
CNGQNTLRNIVHLSK  
PLPIDLYRYDDVSGK  
LRGLLSRGAWEQQI  
EDELQLPRLPELFET  
FKHIKDTRYMSSYFK  
QRAAAMARTKVEIAN  
QNSSVLDRLPQPAES  
TSKSSDNRETPRNHS  
KDTLMISRTPEVTCV  
QLKNLKIRTNRIQRF  
HQWIQETRTYLLDGS  
QALLSKMRAIDLQIK  
KKTWAKVRTAKFFIL  
MSFKDAERGDDTSCE  
VEEIMYLRQIYKQQL  
TTAATVQRPGPGQTG  
VGLWSMCRNTNRGTVG  
XXXXMSARTPLPTVN  
PHPSPEARAPLASAS  
DTPPSALRGSQSVSL  
HCSLDALREFFSTIV  
STSYMHQSPGGPTK  
LLIQYYRAYSIGRE  
ESESNDHRSSSDFFE  
ARFDIFSRYESMKAA  
TNYILEKRETMSKRW  
KAPSESARGPPGPTD  
RKKKSKDRPSKLEKK  
KVELSQLRVAKVTGG  
VTSQFTTRDDILRDW  
GHDEDNTRISSAGCL  
SGSFVSSRARREKKS  
HLFYKIHRNRYPVCT  
GLCIEFFVRCRNDVAI  
SLEKNLDRMKLDWVN  
MTCLSIDRFIAVVHP  
AETVPEERARGDPDS  
NEHCPSKRDPKLYK

LQQEQLRALQGRQA  
RLPTLPKRVPRAGEA  
PDSMFGDRGEIIDPF  
EGQEYYEREDEGYDEG  
EVNAAWQRLKGLALQ  
TFQTLPRASDAKNQ  
FLALILQRTFLQASY  
EHQMYEFRVKAVNEI  
QVWETWPRAQELCPE  
IVNLLKMRQGEEVFQ  
QIHMQRRDAMAHR  
SLSEEIQRRLATGM  
VYTTAEQRPNAYIPE  
RRVRETQRHISTVKY  
AFYEKMGRMLGSAFP  
PGAKVTIRASLGPLQ  
TKLLKALVRKKTGG  
ITLMDVTRNSVLSW  
LVAVLLSRTWHVRRQ  
YLTVTLQRPTKELHG  
AAMFQSERKNPAPQC  
QDHFQVARQNHFPQR  
SPRRRKSRSRSPRRR  
SSEKTQRMSLMRHH  
KHKGTEKRESPSPAP  
FLDVFLPRVTELALT  
HFFPKSRIVRSLMP  
AVQKTTFRVTRLHEG  
GYTEVQFRPYRTDDF  
DPVEHGQRHTATKRE  
HEYEPYSRLKSDIKD  
TKFQKLHRDMEEATL  
PSAMPQSRSTESAHA  
VWEPLIERVEGKRQW  
PNVDYQFRVCARGDG  
SWIADCARHHCSTP  
VLESTTGRENDSQHY  
ELSLNKQRKLNKSES  
AWYMHGERAHYSHTM  
SATLKNFRYHISLKT  
YIKSELDRELQDRYV  
LGLDEHNRVKVYRFX  
LDTYNVKREAAEQWL  
KAWKKHCRGEGKISK  
VFKHGYERYNAMRAD  
QLSEEQGRNLELQVL  
IKVLEKKRAMFECEV  
GTPVFADRLPEKMKT  
DPSAPQPRATSGKD  
KSLLDWLRQQADYSL  
KAAQQHWRHELASAQ  
LNKHTALRGEMSGRL  
TCMKFYARVCRSGSG  
PKKVEMQRSLPGSLL  
AKCQVTPRRNVLQKR  
FVELGVTRVGHMNI  
IMEEAVTRKRVHEDS  
EPIQFTKRIQNIVVS  
LVIQKYWRRVLAQRK  
LEAKQKARKKEERQS

LLEEALLRLLPAELP  
YQTMLKGRCPSVSAP  
LTKEKVSRLDRIVAE  
KELADLARLHPTSCA  
FNELEALRAESVATK  
YLVLQQLRCNGVLEG  
QMVTPPPRLVVGTYD  
VPYFEQCRRDACRCG  
EQEIVQKRTFTKWIN  
KNQGLFHRVLRREEIS  
AACCGSCRNVSCLFT  
SLAKFAGRKLKDCGE  
CSSLSPQRLCSKHMP  
DAAAAGDRRPAPDTW  
LDINVVIRQVYHLME  
DDQEIQKRLAEQQDL  
RYIRSALRQEKALSA  
LEKAAAQRKAKLDEN  
SGEAPGIRKEMKDVT  
REEAEKQRVASENLR  
VLQKCSHRLQELEKN  
MEFAVNGRPLEPSQA  
AREHSLLRSDRPAYV  
SNYQSTTRVKPFICT  
AVASAASRPDSTH MV  
LKYQSLLRMFLSYCI  
NSQVTFPRIQVTSLS  
DALTDPSRKTQKCLQ  
EVLFLSSRSKVFERA  
DTIAHLERTRENMEQ  
AEQKSLLRSVASRGE  
TSAEQDNRF SNKQKK  
PANAGNMRYSHSTGK  
MVAVLVSRTVGPQR  
NHHMEVLRELCEELP  
LVNKDSTRRDSGAYT  
AMVFMDVRMPKFKIY  
LVSHVTLRLLKPECV  
EKFGLEKRQGALELI  
EGCEYEYRVYAENAA  
YACGVEDRKSARLF  
QPDVTGIRLLSLGAG  
EELHKEIRLIGNESK  
SFLKLTTRAQLGAKS  
LRVIEMEREGKGRIS  
QIYGQKGRTEILLN  
IYNTKSSRERAALS  
VELLFNTRYAKAIGI  
YGGSYGGRGRGRRTG  
EDTQYQFRVYAVNKI  
NSQPVAVRGGGGKQV  
TPSPPPRRRSPSPRR  
LEFDGGSRGKGEHFP  
YLMGGTYRCTYTRKR  
MAVGMGERPEVLHLT  
EGGKGEKRKRETDDE  
ITMWLSKRLPQFLQV  
NIVWKYQRYHFIMAY  
LTASPSSRPVASPGA  
XXXXMAVRQALGRGL

QAMPYNCRNNLAFPA  
LFGKMIARAGRAGNL  
LIVCFIKRSRGGKYP  
AHEKRKERLQMLQTN  
ASLQPKGRRDPPLLP  
LQRQHLYLRQRHSAVI  
ELKALAQRGIGYHHS  
QDEWEIPRQSLRLVR  
AALESLNRAVLAAMD  
QFLEEEGRTLEDVAR  
KDDIKSTRKLIKESLI  
YVRVKTERKNFLAVQ  
VNSTHWSRVNKSLLN  
VDTKYQIRIQIQEKL  
AGLSTDNRNVCLWDT  
PRRASPLRTSRSRPH  
MPSKFSCRQLREAGQ  
GENQLLERRRLYHCA  
TTIDDGSRCCFFTKSK  
AAKVFGLRSRKLKLF  
ERLKEPTRQALQQRL  
VIFYDFLRGLEASWI  
DEEASYLRFNRSIWK  
PKNDGGSRIKGYIVE  
LQVITTLRTAAKEME  
SGEGDLRHLGLLGL  
NDQLEEQRQEALQR  
QEGSLARWPVAGQI  
RQILRLLLRCTEND  
DPVDSTLRDFCGRCI  
PVYKTSARRGTLSTT  
KTIGSPKRIQSPLNN  
TNSVTAVRIQPLEDI  
LIPVIGPRKNIKKQQ  
ILVNTNLRALINKHT  
WGTATVGRPRGPPKA  
WLEAQEERLKTLOKP  
GETPEACRQARSYLE  
LRQCLAPRLPHSVTC  
ADEIYELRVTGRTQD  
NAEKYYGRKSPVGRD  
LELESQKRLYEKNLT  
KSEAKLSRKQVDSEH  
SSLSSAGRPGPSEGG  
KVFAKVLREEDSKDA  
FIAKAFKRIKDSEFE  
QHHRLESRYSSSSGG  
LAVGKFTRTSGETTH  
VKMCVGSRRMVDVMD  
QRPSGEDRWQEKDQD  
GSKKVTIRSPVQIRN  
TSENTLKRVSLLAGF  
QPGTFLLRFSESSRE  
TDFWKTLRYLSLLYP  
AEPGEGTRPATVGDS  
PLSPPQHRYSEGERT  
GCFLFISRSKPLKTL  
VFLHQKPRLPKLFKQ  
HSYSVLERFVEECFQ  
TNDLTAKRLLHVKGR

KSLKAKFRKSDTNEW  
LNELEILRNSAVSQE  
EWKFKLFRVRSFEKT  
KASAAMVRLRLYDIL  
EYNAVKEREFHNQYR  
MVTMGFARDEINDAL  
INIDQFVRKYRAALG  
DISALTLRISELESQ  
SCFKDGVRRQPIESI  
PWAKYVVREGDNVNY  
LSFLDAYRNYAQHKR  
SESEDEQRPRTRSAK  
IGSDSQGRATAANNK  
EEPGSSSRESVSKAG  
GPIFTTARQLVHALA  
GQSPFQQRKKKIKRE  
DALEEQQRCISELKA  
YKTLHDTRTHFLKTK  
HSSEHAGRNGRNAAD  
AAIGATPRAK GKAKH  
SKRKVLGRRDSDDDH  
INKEAQKRWTRREQA  
SFMSLQLRELVIKSL  
EHKTMASRAKVMADW  
VKQKELSRIEEALQK  
QYSFNSQRFAELLST  
SLHYALARKGGAGGT  
AHTKPLNRRSVLEKN  
SLDAANARLMSALTQ  
SGLDIFERINTSAFE  
AVDSPAGRQQLLQRG  
LVFHSITRSHAENLE  
AEYTVVARNKYGEDS  
NAQILSQRIEKAKCL  
EDKGEPKRRGYLQVN  
YGQIESVRFRLIPA  
ENQQCLLREETWLAS  
HQVESFIRKKLESLL  
MKFKQKPREEQLEAD  
ASAADTSRSLWGIQ  
LPKVTLSRDGVPLKA  
ETLGVLARAVGEMPR  
EPRRLSSRRSVLTSP  
SVVWLKDRGEVIRE  
ILTLAWDRVDIAKNH  
VYNENSNRQKLEHVK  
FKIAGDMRATCPAFN  
PSHGLADRVINCREV  
AQQEELERRKRLEQQ  
MEDKIYDRQVTKQSL  
EEQPTSQRDRLSQVL  
TNYVIELRDKTSIRW  
QKKSASFTRTVSPGSV  
EVLNEVNRRSLKCLA  
QTAGVIDRWELLQAQ  
RSKVDDLGRTPMSVG  
REGITTKREQVQITQ  
EASTSALRESCQAEH  
PANGFLVRYLRRKLV  
NNTDEMARLIRSVMQ

ASERKLNRRGSMSYL  
YSASTPVRKPRPGQQ  
EMDISADRVKVEGEL  
WDLSKCLRIPASRL  
SLALKNIRCRRGIHK  
ALQAALARVVPSYMQ  
GMYSEPLRQFRDSSV  
MDGAAWDRRNGKLME  
GSYLQFLRILFRMLI  
LKHFIGQREEFETAR  
LVSKDLIRKAGVGSV  
GFKSHLIRLIGNLCY  
AHEDISQRVAAENQD  
EIEEDKARRILELSG  
SMLQHLLRRLVFDVP  
ISPPSPDRPPHSQTS  
RSRGKEQRKLARQRS  
EEAEAAARALARFAQ  
TLTIQKARVTEKAVT  
EFTQDLFRFLQLLCE  
GAHKATLRIGQDGIS  
ANLKMELRDALCAII  
ENSLETLRFSISNLS  
MFKWLVARINRALDA  
HKFLTIPRLEELYNT  
RYNERKGRSELIVVE  
SVDVKSVRMGSIQRK  
KGGSKLLRMKLSDFN  
TGTPSDPRRRLRSYE  
PEVFKYNRFLNPDGS  
ESVKASERPLPPGKI  
AYPICEWRYDACASP  
PETIDTARLHYRNSW  
RSALFALRYNILTLM  
EPLKELFRQQEAVRG  
GDEEQKLRFAFSIYD  
YLMLDNKRKEVVHKI  
RLDPVSGRLSTISSL  
KPQDYIPRAPTFMLN  
NSHHECIRKLLQSKC  
TSSLSPQRSKLRIMS  
QGLKIHQRFHFASAL  
SSKPIKIRGPSHCAG  
HANNVTIRESMQNDV  
PGHFVGPRGPHPSQF  
GLDPTQFRVHHYHKD  
PSTNTESRKDVITIS  
IDAIGTKRYDSNSGG  
AESNSNMRCTCRIIE  
VEVAATERTLLGFFL  
YDYVHSVRGKVAPTT  
SRALSHDRQLISQDA  
GLPNNAERVLLTTQG  
FDFPDLNRFLTRTLQ  
GGKPVQNRELQGYES  
LSLQVVNREIREENK  
KAFVTLERFDQLYGS  
EAVKYSERSLTKCIG  
FGKKAANRSWQNVYC  
TLRMRSHRVPCGQNT

QVSETLKRFBAGKVT  
EAVNVCGRATAVVEV  
EKALRSMRKAQVSPQ  
EKVLSPLRSPPLIGS  
LDLVSHPRATQTHVE  
LISQINKRYKTKDDI  
SSEKVAERKETEFFF  
TAKPINPRPSLPPNS  
EAKAELERKLSEKDE  
ITKVGEEKGPLPKS  
LVEETEERLVERISF  
QIYSTGLRKGNLHNV  
KHFPNIDREKAMSRP  
SMSKGGKRKDSVWGS  
WADPTGTRKLTWTYA  
AQIADGFIRVDLAS  
LRDWNLIRDAATLIL  
AEAADNQREEAADNQ  
VYQIKVHRKYTGEDF  
ARLETLVRKAGEQQE  
DASPGDKRLAAYLML  
LSSYATARLMMNNEY  
KLPVDFERSFQEEKP  
GPLPYPERQKRARM  
DSAKELQRSVEFDRE  
TGTLVSKREVELEKN  
GLFNKNPRHSSSENN  
FNVPDEERCSFATVN  
EREREREREERA  
QQLNKDTRSLGEEPV  
FSPLISARFGMGSM  
KTKTDYTRIKSLSIN  
SSPSSGQRSASPSVP  
QHTTMATRSPALPPE  
VQQVTFSRGTDGQPL  
KKKGGLFRRGSLLS  
GNFTDAERRKCEEEI  
FLNPDPLRADGISDL  
WFETQEKRLKQQHRI  
QGYIIEKRRHDKPDF  
SLWSNTVRCYLIYTD  
FDFQAMGRIFVGLCQ  
TPGGTISRARDLLK  
DTDMDSLREARREDM  
KKLRLKFRDVKCIDP  
EPSFEATRSRNRYSV  
SSGKSVARTSLQAED  
VMLADSPREESNKRQ  
LSCLTTSRSMTDKLA  
KNYVIDKRESTRKAY  
VWGGIWPRHRFSLQV  
GRREAGSRAHPLRL  
YIQLEVPREATISYI  
DSVSEATRQDGVLR  
NQLAEKVRLRLRYEE  
ILKPMMLRRLKDDVE  
VSPFPKGRGRPKRQM  
ATDQEKSRKLHELV  
MVLVSLPRIQSQRVQ  
XXXXXXMRGAMELEP

FREEEQLRQEREEQQ  
QNLPVQDRNLMLPDG  
DEFTTLARDLYAFYP  
DMAAHEERVNEVNQF  
TAEDIQERRQQVLDR  
KMAEESERRAKEADQ  
ALHQKTLRVDVCTTD  
LAAERHARLND SYRL  
RLDDEIGRKVYMRDR  
IKIQAMWRRYRAKKY  
ESLHQNSRATLLYGK  
QSKALTERLKLNSKR  
PSLEGDLRGPDKLE  
TFYVTKSRDALTETA  
AVSSADPRAPGESPC  
PISDGGSRVIGYHLE  
PHQIGGIRFLYDNLV  
GNMELEKRRQALMEQ  
EEQQESARAVPEKST  
PDLEKVVRYLAGCGL  
EMEPLVPRVKEVKS  
YNINTYARFCKCCRE  
EKIDLEVRSLTCMY  
LAKMFLNRINYWHLE  
TILDMVERECGTIIE  
KLAYYEIRYQFYKRD  
VPTVTWLRKGQVLST  
DMNKVKLRAIERSPG  
LLDSPYARVHIAEDQ  
GKMPLEERIQKIKEI  
KLKPVELRELLNPVV  
LQVVACTRGGMSRLF  
YLQHLCYRNDKVKTD  
DEVEVYSRANEQPC  
EDFSQLLRNFGWLQ  
LLFRGANRDVRNYNS  
TKSEKLVRLHQEYQR  
GPLASHMRWFIWLMA  
QSVQETVRVRKVDVS  
SLPCLSLRKLPPRSE  
KEVEVAKRNLAQQKI  
LSPGNSARLTPLRYD  
TVGDSSARPARRVLL  
QEEITEYRRQLQART  
MPWKTCWRYLTSGGF  
IVVEEKVRVPEEPRV  
PSFSRQLRDVQETVG  
KKFGGPGRMKQSCVL  
TSLQKLFREVRIMKI  
PPVETIQRTTARDPI  
SQLLTSVRRMVLTLT  
CKLAALVRHRVSLFG  
TLFSNVQRVQGVSER  
EVQYEIFRSLMYWMT  
IELPDLGRFYKIRVW  
AAEELLQRCISSALP  
ELSHDNIRVKWFKND  
VPDALNDRHPDVRKC  
NNAENLFRAFLGELK  
VIAMLGFRLLDAVKS

KNMLIHGRAMLLVGR  
AQAGAKSRPKKREGV  
DFEYKLDREFLKGCK  
LDALVMDRVAFVKLL  
VSIEAPKREPQPIKE  
PIGYQCSRUYWSTTD  
SANKENFRILVESVK  
HQLTEEDRERLKEEL  
EAAQLSERTAQEVRT  
ECIQMKARLTQELQQ  
AGPGLLPRKPPGLAA  
NFPVHLSRIRRLRAE  
KVDQFVTRFLLRETV  
HYPFENKREFEDAFP  
NNLHSGIRKLEDYLT  
RNLWQSSRPLICLLD  
IQSAPNVRWFQWFKAG  
ISSPPACRSPSPVAN  
GYPGGKARIIHKESD  
DQRLHTTRSVMQDE  
APPVTSARFPSWVTF  
DKCNDIIRNKDDTAA  
IEVPISGRPKPTITW  
TEINAKLRNIIVLDS  
VRQEQHKRLEDLRRR  
ITDASALRLVDKAQV  
SILLDFTRGSRGRKN  
FHHCEQCRQYMDFTS  
EYEMPLYRKYWPNHI  
IRPRPPSRRAAQSP  
RAARTLYRIELLRKV  
VGGSGLPRGRRPPRW  
MHHDPLRSMAYWIL  
LCTVATLRETYGEMA  
CAKQEPERNECFLQH  
DDNPNLPRLVRPEVD  
KYLVEIARRHPYFYA  
ELLFFAKRYKAAFE  
KASSAKQRLKCASLQ  
FKAWAVARLSQRFPK  
LLECADDRADLAKYI  
MFLYEYARRHPDYSV  
YSVVLLRLAKTYET  
FQNALLVRYTKKVPQ  
PTLVEVSRNLGKVG  
CKHPEAKRMPCAEDY  
CTESLVNRRPCFSAL  
PIPQCPPRLDVQTIQ  
WNPIEGERYLSFLRF  
QFLEQAQRELAELLD  
LNFTMNRHTGPAWN  
CDCELQHRVEAIVAF  
FCQEMKFRNKMVEYL  
QEEQAARIIRNTTA  
LVIEEQLRRAAYLNM  
DDIKCLTRDLQASM  
DMKADVTRLPATIAR  
YLHLLTLRGSVLRVE  
MKCSSMQRFGERAFK  
GKNIIYVERQRPALGE

SKPEGTPRGPQVYTM  
KLTGMAFRVPTPNVS  
SLGKVGTRCCTKPES  
GPLSLASRNRSQDSG  
LKNVNNMRIFGEAAE  
CQKGFVLRGSGVIHC  
VVVKLLIRRPECFGP  
CAKQEPERNECFLQH  
TCKKFDLRVTIKPAP  
KATLKNLRKQYRNVK  
LVEVMMARRDDLFC  
TENAIGSRKFLSLGL  
YHKDLQTRATFMEVL  
ANIHKEQRKFCLAAE  
CSGSLVERRPCFSAL  
YDDKAIERLLDRNQD  
EHMPNDSRLKCLLDP  
VLVFEQVRLLMKSYS  
TEILKWLREILICRN  
SFEVDPTRLEPSESL  
NMGQWKIRAFYEHAP  
FSKKCSGRWKTMSAK  
EIMEACMRDIPTCKW  
VNGILVSRGVKDMEL  
TLGSTVGRLQEQLGP  
GLAESGARYTEMPHV  
PLPPLLARVGGNIEV  
TYPGLSKRRLKPEAI  
STLQTIYRLSKGRSL  
YPVGTVLRVYICRPGY  
GGITGNMRQEADR  
EKETDWLRNEMNKDL  
ANQDFTNRINKLKNS  
KYLPGLLRSGFYDLL  
GVVWVPFRGADYSLR  
RIPPVAVRLQMSERN  
LFLHGYQRFWIETEA  
LAFDVGLREHATGYL  
VCALGNSRVASALCS  
ENAQTGGRKRGMSRR  
VSLHLPSRSSPTVFR  
LHKTIVKRRMSHVSG  
YELLLKVRPEQLVKH  
PMKYSCQRRARLITQ  
VLVNSLHRIITNSAL  
DTTVKKTRRRGQKAE  
EKADMEDREKEDKIK  
SCRSVSREINLKDY  
WLISKLDRELESSGI  
PAVNGTLRTSSYEEH  
WVQAVVSRFDEQLPI  
VPLVVFKEKEIARK  
DLSWSMLRGCKEICC  
KGDPPKPRGKMSSYT  
NPDGSPARRVPVVTQ  
IPITSSSTRNIRLYPD  
MLQQLLRRLLVFDVPQ

IQQLEQRISASGAE  
TSFSNYYRTWNVVVH  
EAGGAGTRARSLWRV  
GQPKDTMRLDETMLV  
DDIAILARYMLMSF  
FQNAILVRYTQKAPQ  
AHTVVTSRVVNRADT  
GDLYGAERIAELLGL  
QTLWLWARPRAGGAW

**Supporting Information S4: The benchmark dataset  $\mathbb{S}_\xi(\mathbb{T})$  used to train and test the model for predicting the possibility of carbonylation at Thr site.** It contains 121 positive samples and 732 negative samples. None of the sequences included has  $\geq 30\%$  pairwise sequence identity with any other in a same subset. See the main text for further explanation.

(1) List of the 121 peptide samples in the positive subset  $\mathbb{S}_\xi^+(\mathbb{T})$

HLELRNRTPAAVREL  
PRKRPPVTQAAGALP  
LLAKQHKTQRSPVRI  
NEPEAEKTHLFAKQE  
RKSLVMHTPPVLKKI  
GSKRQLQTPKEKAQA  
KDGSVTGKRLRCMP  
DTEEADRTSSKKTKT  
MPRRLTQTGKRKHGA  
GTARRTGTPSDPRRR  
NSKHLNGTITAKYTY  
GKEMLEQTLQKVTEL  
NELLKQKTIELTRAC  
LDTMSKKTALDQLS  
ASKEQGPTPVEKSKK  
DLIQHRRTQDHKIAK  
IEEELKTTKRKMNLK  
VQKANPGTLAAEIRA  
WIWVQLRTGLARDGR  
VSAAQTTGTAPGAR  
FQASLPLTRIDEEEA  
LNDKHLKTLSTVFS  
RPLKSQITVTRHDKR  
DSKNSKKTNTEFLHT  
ERVEQFLTIARRRGR  
PDDRTARTLTLIAKV  
RDLRFVRTAEILAGK  
KDNIPPLTMKRIRER  
KGITFIFTDSEIKDE  
MHFRSLRTKLLMSR  
RQPVTKNTRQYRVL  
SEVLVQQTQIRIQS  
FVQRRGHTVLKIHP  
KAKKPAATRKSSKNP  
MAVLEALTGVLRSRG  
HSGKLYKTKSNKELH  
VQSIKLITEGASKRI  
YSAEWKSTVSRLGRW  
GAFKAVMTSIKQLSS  
RDKLKFTRPKVRVP  
VKRGDIFTLEEELPK

QLIPIRHTKTREKVD  
NEIVNIRTSLLNLVD  
KQELEVELTANIQDLK  
PKDEDERTVYVELLP  
EKIRLAKTQQASKHI  
EDLGRKRRTMLKIAT  
EVAEKQATDVKPKAA  
EKFKALYTLPRSVDD  
ARIKAKLTQIRRYGE  
SKGELLSTLLTKEKA  
LTKLKAKTDNVVQAK  
QWIRATATALERCSE  
PLGAEKITGELEEMR  
ISNVDVETQSGKTVI  
LPDMSVKTPKISMPD  
RSIRKSSTSSDNFKA  
TPESKKATSCFPRPM  
SVFLRVRTNVGVRVL  
SVSVEKSTSSNRKNQ  
TSPLQSPTKAKPKVE  
SQGKLLRTILFGVKR  
STAVGLVTKDPGKKP  
LGKKGSTVGLVAKD  
NYDKILATKKNLDHV  
RAALDKATVLLSMSK  
LLRAGYLTLYGIEAL  
ETKETTTTNKQTSTD  
TPKKPAPTPKEPAP  
RTARAITTRSGQTLS  
KNGKVYFTSDAGIAG  
IALTTYETLRLCLDE  
SSVGWDATEDLRISR  
TEELIRLTQRLRFHK  
NHFLQVETRRAGERL  
QTSLIVATLKKMLPI  
DVKSTAFTFRSSKEK  
NKEKEMVTSLFCKLG  
LRIHAHFTGLRYLLY  
TSSPPRKTRRLSPSA  
RLLRIAATPSCHLLH  
PPKRAPSTTLTRSK  
LRKGIPRTKSVGEDE  
EPARWD TTLPTSPK  
WKKLLEATELKGIKL  
VEKPPKFTEKGNLEV  
LRLLNKHTALRGEMS  
ATRVRNITKKSSHLP  
SYKLSATGSVVSTR  
ITKKMDKTIPEGRIR  
VARQTLETIRSVGY  
DLKTIYQTGCQTSTV  
ITKSSTSTIKDKDEL  
VRVTGIPTPVVKFYR  
IMKETRKTVPKIV  
KKLSDISTVVGKEVQ  
SSEPKECTYTIPKLL  
VDVKFKDTVILKAGE  
KILSNNNTSENTLKR  
CLQTL DTKFVHFID

KPLKKKPTPVLLPQS  
GISSPLTGKRQDSG  
VLCIIQDTTNSKTVN  
QLSKKLKTVLDQARQ  
LEEIKERTATGLTHI  
KKTILMVTNRRVLCI  
RKIKVSNTLESRLDL  
KGFTVKRTLVIHQRT  
LLAPLNDTRVVHAAK  
NETRESETKCLKELPG  
DGTWSPRTPSCGDIC  
RDSARQSTLDKELXX  
AVSEHEATKCQSFRD  
KEGYGYTGAFRCLV  
SSLLEACTFRPXXX  
LEGNKRITCRNGQWS  
QKLEPLGTELHKNAK  
CLLPKIETMREKVLT  
KVGTRCCTKPESERM  
TPVSEKVTKCCTESL  
EKQIKKQTALVELLK

(2) List of the 732 peptide samples in the negative subset  $\mathbb{S}_{\xi}^{-}(T)$

HGSIFSGTAAPRCEI  
SRNKSGRTALMLACE  
LPAIFEYTVVGEPA  
SIAFQMPTIAKDGNV  
YDINQIITAVMTH  
GAAGLEGTAATAAAG  
AREPPGSTAGLPQEP  
KMMHIAATLIQRRFR  
CPPGLYQTVPPEEHY  
QNIPPSFTKCLKMD  
SASAPSSTPTGTTVV  
VSPRGMVTRSSPGAG  
DEDDNMSTVMRLRTK  
ARNGISPTNPTKLQI  
RELQARLTLVGKEGP  
NLKFQPPTLGPEPAA  
SHRVGAATAGRLPAS  
PAAASLSTATDGLAA  
PKESMLKTTLTAFGF  
YPEPRVLTIVRITPV  
DSLPSPTIVSGDIP  
RVNKVPVTMTRYRST  
HLRKAAITIQSSYRR  
RLLMASPTRKPEPQV  
QYHKMYRTVKAITGR  
KSKKRNSTQLKSRVK  
KAKEDDKTLSKEPSK  
GGGRNDITGRFTRHL  
ENHPQWDTAIEGDED  
DRWNSAFTRKDEIIT  
SEPSDAITCRDDVEA  
PRCAEHGTCRDGKCE  
NGDGGCGTGGRNC  
LCKAFVPTCIEQIHV  
DFEVLMTAHGHLVP  
IVYHRKVTDDISKIK

RSSRKICTIGIAPWG  
VQGDSQGTPTSSQGS  
YIVQKRETSRLAWTN  
DRKILDDTEDTVVSQ  
CRDELVRTTAQYDQA  
QEKSPVNTKSLFKRL  
IEELLSQTTNPDRFS  
ATQPAAPTPTATITS  
SKKDDFFTSFKISCQ  
EWRRANHTPESCPET  
PSAFYQQTLPNSHLT  
MREEAERTRDELERR  
GHMYMILTPSDIQIQ  
SPQREVLTVPEANSE  
KLESLVLTHLSRCDS  
FSCGADGTMKMRILP  
KPESIKVTTGDTCTL  
VVKYRAGTSVKLRAG  
LKDLLLNTMSQEEKA  
SYSSLEETIEVKGAG  
PHGGAMDTHFANMRS  
KFTSITDTPEQVLAK  
AQEERLKTQKPELV  
NPYSLLDTSEPEPPV  
ICESLEKTKQKISHE  
ECGLGHRTVPLLLAE  
SFIDGLATFQISGAR  
SSAMESLTKHLFAIL  
RKLDLSDTKSIRAF  
PEAKCACTDSMGVPR  
PGPPVNVTVKEISKD  
VSPENLHTEEILVCG  
VNIQLKGTNEYVPRF  
PIAAVLATFVTHAYA  
LESHMILTETLFRKI  
RLTYTERTKSTITLD  
LSRKLRETDSQLKT  
GDKRRVFTFPCLSAF  
VLDEDEETKEPLVQV  
SSQEKVATLTSQLSA  
ESVSSLSTNDFSIPW  
CFIKLCITLNEGKSI  
SICSARVTLREPPSF  
KELNALETSSSAMDM  
SSTCEPSTVAAVLSR  
ILKAALITEENQQLS  
NKYHWEHTGLTLREV  
MRTQEDLTQGLLLID  
DKEGRELTLEKPELK  
HQYKCLKETIQKLSNV  
QAEAVLKTQELKKL  
LDCVLDLTMKIHNS  
AKGDRAATLEEGNPT  
LKGTQEITGDDRFEL  
LVVFNHLTPPPPDEH  
VSPLLSRTEFCTAPL  
FGQRLDETVAYEQKF  
KRLQEEKTQEKIQEE  
PTGPELDTSYKGYMK  
VTPEVKKTSFHVTNL

NSSNFMNTTNFQSLR  
SASKHSPTETEESAK  
VEGAKKVTVTELLAG  
ENMNRSETEACFFIC  
EVCQKSLTGYLEKKR  
GLSPGSLTSLAPSTH  
GEQLGVVTNWPPSLE  
LIGPCCATANLEAKW  
AELERLRTQLLSHE  
GQTSMPGTLVLCLPQ  
TLQRTGQTILPSLNE  
VNSSVKRTQIKVTHL  
MASFLYSTALPNHAI  
TVAKELQTLHNLRLK  
IARILKDTAIKSADN  
GDGDLMMTSFERMLS  
RIFADGKTWSYTYLE  
DLRKVYGTVLSRHHH  
ALGRDILTKTKQARE  
AMMSVDETLMCSFQI  
XMSLADLTKTNIDEH  
AAGGPKLTKRGLAAP  
SPAARISTSPIRSVR  
FKGRPPPTVTWRKDE  
AALECYNTFIGERTV  
MAEILSGTESVPLTQ  
LLAPVALTCGSDGSL  
YEGWRIDTYLDIPLV  
QQMCCVSTSIVSFVR  
YEGGAVCTHARSLWR  
KFHGVLTLCLEVVV  
RMVYCSLTDQKAVY  
SQRVNGLTSSKNSQP  
CSLRPNQTEEGTTPP  
HESQISFTIEGPLTS  
AEAKPKSTCELYSSQ  
SESPVYPTKFDSEKE  
VEKLLDCTVIVDSVF  
TVLKSSATFQSTVAG  
KQQKEEKTQEAAYAQ  
GVCVSEGTILHRRHS  
LERQNLETFKDRMTE  
IFESVHGTAPDIAGK  
LGPADQKTGTPTPTS  
KLCYDAFTENMAGEN  
KKGASFQTVASLHKE  
KDAYKVNTNLDYKKQ  
VGKPGIPTGPIKFDE  
QKSDDKVTLEERLDK  
RDFVGQRTVTFSSLV  
LEISEDCTYADV KAL  
KNCREAFTADGDQVF  
EPLPAKVTERHMQIT  
ALMRSEETADLLAEK  
IDHKEKSTEINHEIP  
STERLKKTNEILKGI  
CEESLSQTPPRVTGT  
GPSSERATPAFHPVC  
GPKQASFTDVRDPSL  
KIQQLVNTLKRPKRP

ICELSFETEHILLQH  
KKALLPPTVSLSATS  
LHNFSIYTLLGKQVT  
KDLVNRYTQNGSLDF  
KGEDPLATDTRVSVE  
LKANQVATGIRYNER  
LQSHFIPTIGRLRKR  
AFMDISATDLVLRKV  
AFLRHKMTLISPIL  
YLRNLPITAHPEVFG  
LWEGKPRTYITEERA  
IRILCCLTFLVKVKS  
GYGSNKKTKHMLPSG  
EPALVPGTPKAEDRM  
GYHVINNTFQSLLGC  
XXXXMWPTRRLVTIK  
RFRHLKKTSTKEAVGV  
KLAQLIATCPPSKSS  
LKDSDEITEDDNIRM  
GGEVIEDTYGAGGGE  
PKAAKEKTVKKETKV  
PPEVLDVTKSSVSL  
HPSVMMTAGRCHTL  
AVPAAISTSEAAPYA  
VDRHREKTLRLLWKI  
SLKSLILTALQRETE  
RVDALERTLEQKNKE  
AGGSLKVTLQSSDS  
TLTAYIVTSLLGYRK  
GKPVDGLTTLRNGTL  
TKQSFSLTMSIEMPY  
LVSKELSTWKERPAR  
GEAGGGSTAAEEASE  
IACDNIGTPLAVFSG  
RPCDEDKTDSETGKL  
RTSAPSPTALKLATV  
RGQPRTRTRASVRGF  
VENMILLTIQYLVRL  
VMADDEFTQDLFRFL  
NVSQDLDTIRSNINN  
SRSKADYTSHLRSLV  
KSRHSDGTEKNKLPS  
SVPKVEGTLKGPEVD  
KEEVPEPTPEPPKKQ  
ADGLQGETQLLVSrk  
NKVQLMVTDSLSNQ  
ILYGPPGTGKTLLAK  
CIEVVFVTKFLYSIL  
EQSIWNVTVLPNSKW  
GLNMCAPTDQDLITL  
SLIKQIATKVHPPGT  
HGREAKVTETARVPA  
TDGSEIKTDEHYTVE  
SFIWELITPTKDGQA  
AAMRAFKTVTTKCSK  
SDKFYKQTVNLQLQP  
EIVFCAVTSNEQVKG  
PPHLKPATEKLIVVN  
EVKGAGMTEHYVTQL  
CLKEIDSTLYKNLFV

SPNPDVWTSEQNPPY  
EWPFLIITDLFLKSP  
YEAQKRITQVFELEI  
KAVVNEDTQGNVSQL  
GFTFGTATLASGGTG  
PSEAIEITAPEGSFA  
AESGIRYTQMPHVME  
DALCLVLTLMNGGDL  
KSLQAVITNLTQGEE  
LQPEPINTPTHTKQQ  
GTLVSHVTLRLLKPE  
VNVRRDSTGMPLWLV  
MFDERIFTGNKFTKD  
KVLKWNFTTTPRDEYI  
DITENAATVSWTLPK  
SSIQEITKANEEFQ  
GSMLVSWTPPLDNGG  
FLPLFKATINPQDHR  
PRAEKEDTAELGVHL  
CLSVLSSTSLRLHSN  
QSLQLSTCDVESKR  
HSADVHHTFRQLDRL  
HQQALPGTHIPEEAQ  
SAPYLLATSCSDEKV  
GLVVKAGTTVRFPAI  
ALYSRIGTAEVEKPA  
IALSSSETTKHATNT  
NRLVDYITKTSCHLA  
AEAQPEATAKNLLHS  
FFLYSKLTVDKSRWQ  
CVSSIFWTQEVSQAL  
ALQPSVLTCMNGGAG  
YKDSRGLTPLYHSAL  
EPKECTYTIPKLLEG  
EALIKKLTQDNLAL  
AIQIASATMPALSLN  
QKEVEQQTGLSVFLP  
LEEKAAMTDAMVPRS  
NVIRSIQTDKREKYY  
AGGHPLDTPHLPQEL  
KVQIHHNTWLHFPGH  
KAEPLAFTFSHDYKG  
KLYIEAPTFDLQGSY  
DCNKAAVTIQSKYRA  
TILEPLFTESESKIF  
RHLKESQTESTNAIL  
GDGFYLPTAGAPGSL  
LSLSVELTEAKLHHG  
PSQFPSETAFLEEFQ  
RVASNPYTWFTMEAL  
PSPFDCSTDQEEKIE  
TSESSIHTITPSVVN  
AELENIATLCFKALE  
EQVAWALTKFPCLQL  
KNYSLKYTKYTKKDT  
QHPAASPTHPSAIRG  
QNAQVCQTNPEPPAT  
IPVNEKDTLTYFIYS  
XXXMAAATVGRDTLP  
IILGNPATELSVATH

KDNSRDETFHFQCDC  
YLDGNEITAIQKHGI  
LFGDVGDTGERLLYN  
KKAEAVATVVAVDQ  
NLELRNLTVELEQKI  
VEDNKRFTRIPLVQL  
EALHELRTAEFEKTE  
QDLRVLPTIDLSTMP  
LADDLKKTVTIRAGA  
AVNNYHKTNPQTQE  
INKFAEYTHEKWAFD  
TIRGDLETSNLQDMQ  
GEGECEQTPEELEPV  
LREAGSVTALVQCVL  
VARREQNTRKDIPDK  
ELHICFETTKSNEAM  
LGHDEDNTRISSAGC  
VVRDAVITSNGTLPD  
QMQLDDSTQLNSDLK  
VKS VN SGTWIASNSE  
RGMINVSTSSDMDHN  
VRRQEDGTQPQVNGQ  
LHPRAVSTSFGRVN  
NIAVILLTDLIIDHS  
DYLRWVQTLSEQVQE  
CHALSGSTAELREDL  
ESWLVPATLPGPGES  
HFHIRCFQCQVCGCG  
QIQFSQCTDRIKDLE  
NKPVSFLTAQQLQQL  
WGWRIERTREGDSMA  
PPPAPRPTSRYNSSS  
WSWSEQNTNEQQPDV  
NLGKKPGTITTVGLL  
LEVIYGDTDSIMINT  
ARLMSALTQLKERY  
TINIICTVDYLLRL  
QKREAEETAQKMAQL  
PEKAKSPTKEEAKSP  
DYESYEKTTRTSDVG  
SGNIKNWTSLMAAVA  
PPARLAKTPSSSSSQ  
VDSSQKPTPSAREDP  
MLCEEVTSYKALKS  
LVLEIEGTVNSTTYI  
SQLKSDLTSRDDLIS  
QTKVVPQTVMATVPV  
EDSGGGGTGVKKKRRK  
DQIIPRMTTQSPLNQ  
KEIDNDFTNETKISP  
AENGKEGTAKGAPG  
PRPLPRSTFARPAFN  
YLLVLATDLGSPQ  
XXXMFKNTFQSGFLS  
EERCSFATVNIQLKG  
TPLGPGSTSSLERRK  
PSSLKGSTSLLVHPV  
GYPNRDSTKYAEIYG  
KVDQHEWTKCNTTPT  
SNQPASVTDYQNVSF

KFPGPSHTESYSWPP  
PYLSEVLTFCLEVAR  
CQDGSNLTASQRAYA  
KNLRSISTSNOQRKK  
KDVNERNTVKGFRKF  
NCQDKLETSLHVLNQ  
RSAELGCTVDEVESL  
HMHQNVPTTEEQRNK  
KKQSKKGTEEKKKPS  
MPDPVDPTTVTKTFK  
IASNSELTPSESAT  
RLQMFNVTPHHHQHS  
RPDIKKATQAAKQAS  
SKKLKKATGASKKSV  
APKKPTSTKKPKTMP  
ELKHHHVTLEASQKE  
GWLLEEQTRKKQKPL  
EVIYDAKTVNAVVEF  
SECGKGFTMKRYLIA  
IRLPRKATKTKKNYK  
TPVPRVRTDYVVRPS  
PVGKLTQTSGKTTQT  
QARPGEGTAPLPPPG  
TPLQPQATTLPAQTL  
KHVSRQDTLQCCQAW  
QNEFLGCTDRLVITP  
SLTQAAFTPIPVDTS  
KDPRQQSTPQAANSP  
KREKEQVTEPAAKVP  
EKNQALNTDNYGHDL  
PESIPLGTEDRISAS  
QHKAVLLTGEQGTA  
DWVDGEPTEAEKDFW  
IWIFAHVTQGQDPWI  
YLCNAQITMLQMLAL  
KTDMLMITRRGVLFV  
EELGSAGTSARCPPQ  
LEARLWETEKICQLE  
TDSRTSLTIENANRN  
GPSGSGKTTVITILM  
IREIQKVTKLDRDPA  
DSLEEKYTEPVILNL  
LWAALLVTFLAGCQA  
FYYYWKKTPEAASSR  
PYRDSKMTRILQDSL  
VGEISVNTSVAFLPY  
VVVGEIVTEEHLRRA  
EFRIDSVTGAITVAK  
RGASFGSTSVSGSEP  
TTNKQTSTDGKEKTT  
VEHLEDQTVTEFDDA  
EGSDIESTEPQKQCS  
QAPPPQPTQPLQPKA  
SKSSQIGTGDLKILT  
NSQLARHTSPSVISD  
DRSQGGETLDECGLK  
YYGLSGMTKNTFEVF  
ENAEDDKTENQIPQR  
XXMEDSSTDTEKEEE  
SEAINELTVLVLVNT

MSLYASLTSEKVQSL  
KAFCRMVTRKLETQK  
QGEVEEQTFKEKELD  
LDDNKLLTLPNGERL  
EGYYEAITAVELKSR  
SLHQEFSTKQKLLQN  
VRDPVRDTPGTCHVT  
KVEHVKVTVLDVPGP  
KESDAMSTQDQHVLV  
DSSNCSITREHICVH  
NLVNKDSTRRDSGAY  
TVKVTEATITGLIQG  
TIVPHGYTEVANIPV  
KTADHFWTDPSADEL  
ALGEKPITFYRQALL  
NSSNKSITLNGTKTW  
DVSGILATQVYTWVD  
NLDLDNETFHIIYQPQ  
IKRKQODTPGSPDHR  
RHRINPETDLPRKLS  
GKDQEERTKAIEAFR  
ELYEHWKTLMNRQDQ  
VKGAAGRDLRLRR  
LVDIQGLTFQVICSY  
FNYLKDATEVKVHIE  
DVSRDGMTLTWYPPE  
PNLSCKRTLSFQLL  
AVKGAPETLHSMFSQ  
PSGADSKTVKLSKSPV  
RILRDVHTALSTPGS  
PPALQAPTGVTPAPS  
AIDGGKNTSGLPAEP  
LDPECKCTDDRLWEA  
SHREKPGTFYQQELP  
IKRQVVETMGLFHDM  
HPPLQPLTGSAGQPS  
MHFESFITEKKQNIQ  
PHIKPPPTTPIPQLP  
ELAWHVKTITITIME  
GNPRVLDTSRSSISI  
DNEGISTVITFMTS  
KVEQAVETEPEPELR  
RSQKSLWTIKSMSSE  
KKLKHRTSETSISP  
LSPVLPFTPAAMTQA  
SSYKEDTVLHLCLR  
QEIVQKRTFTKWINS  
TPPQPSLTASPSRP  
LEDEGEYTCMASNDY  
FVIDGKTTCKLKMK  
SALAEGSTYVPYRDS  
DGSRCFFTKSKTDYN  
AAETARRTREFRSPP  
KSLQWGITSPLLRC  
PPFSPHPTLLSSTPK  
TFDIEAVTLGTTSSN  
AEEFNDETNRGRLF  
FHAVAWGTPGFLTVM  
VYLGRDKTMQLLEEL  
ENLNKLMTNLKSTAP

PFQMDPETGLITVRE  
QREIERNTCKIKLFC  
TCIHGVWTQLPQCVA  
YLDFSVSTTGMLAGV  
IPEPSNITGNSITLT  
NGVSVEDTINLLASL  
TSSAQKITKSVKAPT  
GSQFFITTKPAPHL  
PTDEVPSTPLALEPS  
SEADSSETSSEKEN  
ERCIKELTYQAEEDK  
IYGKPIPTIQWIKGD  
YDGGSPVTGYWLEMK  
SYSENIATLQFSRVE  
HSKKVLNTGHPLVTS  
VRPARRRTPSPDYDF  
INIEHALTFLRNRSI  
AVSSFKKTSEMEASS  
SGSQMGSTLSLAERP  
DGERDPFTCPGFASQ  
HGNNQDLTRNSSTPG  
YYALGQATGLDEEKR  
NIVHLSKTHFPVQV  
LRRIANVTLIDLRC  
EYQCSSSTPSLNLN  
VAGQIRATQQQHDFT  
SSVHAQSTLESVISQ  
ESVSSPPTLHMKTGL  
ESCGSNSTNRSTAES  
NEKVEEFTTFVKALA  
VKWFKNGTEILKSKK  
LACKVTGTPPIKITW  
YWVMAFITKTIKLVK  
KKISAAQTRLSELHD  
ILRQLRQTVEATNSM  
LIRSASVTPKINQLC  
PSVICEHTKQFQTIS  
NKQQNFNTGIKDFDF  
PYPSEASTTFPESHL  
DMAPLDHTSDKSLLD  
QKIERVSTKVIRTLK  
GHPAPPVTSARFPSW  
ILNSLGLTISVSPSD  
GAEIEIRTYDLKANA  
RKAASATVSVQVTD  
VLGQLGITKVFNGA  
VSMHKFLTIPRLEEL  
LELYLVKTSDSGTYT  
KKDGFNITTSEKCN  
VPPSSHETGFIQYLD  
ASDKYRMTFIDSVAV  
VDPSKFMTPIAHSQ  
GSAEGGPTLTPATS  
VQGNPGKTKKGELSI  
EIEERARTEIISTDN  
QLRDVQETVGLPVVVF  
VPHILRSTLPATALP  
DLDIHQVTPDPSPT  
VDASFMQTLWNMNPI  
FPLPDEKTKKRIFI

ENALQLGTPVLIENI  
LLAILLKTTNRASDV  
INNVERRMTSHPTLPY  
EKNFSFLTGANQHN  
KQSQEEETHRLEIEE  
PAAIAAATTTLAQEE  
LEGKMKGTKVKTPEM  
ARYSIENTDSSSLT  
GWGSPQATAMVLNNL  
FGGLDVLTIISLGGIP  
EEGLRAWTEGEKQQV  
KAEKSSSTDQKDSKP  
YSLWEHSTKNHLQLE  
THEASKLTNHVELFK  
SLFVRDATRDHRGVY  
XXXXXXMTTQAPTFT  
DAYLVLHTAKTSRGF  
YQVGKEFTSKMDLEK  
KKEQCSSTQSKSNKT  
QINKRYKTKDDIKST  
REKVASDTEEADRTS  
LGHLAKFTCEIQSAP  
HVVFGESETGEGENND  
TAITVSDTVAVKETS  
ITLPVASTASTSLVV  
ELNRKIATQEVLRH  
YQLSKEYTLDVYRLS  
SLGGNAKTAIIANVH  
MIKVRQYTVKEIREG  
EFVSHPSTTCREQMY  
DSGEKRVTITEKSA  
SFLSSNSTFCNKQNV  
DCKKLIDTFGIRWPE  
PNRTGARTLADIKAK  
VQQVHEETANTIQRK  
KVAERKETEFFSSLP  
WAVDRCYTGSGRVAA  
KKQKSIFTSVPDTPD  
EARNDAGTASCSIEL  
EMKKS VHTQVNTNTT  
QELYLFDTTGKHLYT  
DQLNEQVTKLQQQLK  
ARLREVQTGWEDLRA  
TIKAIKDTEAQKVST  
NFKKENETLKSDLNN  
DVNVIEGTKAVLECK  
SCPSEPNTAALQAAL  
VLPRVRFTRHGKELK  
AASRPDSTHMVEARQ  
KSDVPPLTTKGKKAT  
AAQLKPMTPFKRTRI  
KINREKATFKHPRTT  
HCISLKDTNKRVESS  
SPSADIGTTTEGDSI  
PSRKSVLTDPAKLLK  
FSVSICQTLMQDQQT  
AEELSYKTAHEDISQ  
LFVIDPNTGVITTQG  
LDLGSNTSSHRTVP  
WVNEKMKTATDEAYK

ISVSPLATSALNPTF  
LSVSVVQPTTFQET  
CSELSGNTKSRESIQ  
VIFYRDKTEELMELT  
SCGKKEYTIVVKVLD  
IDQFLIATFMQLRLI  
QQQAFPVTEIDCAQD  
VKGVDVTLPRVEGK  
NSSPDEDTEVKTLKL  
MATFECETSEPFVKV  
FYLNMKMTFEPPFE  
KIPSRFSTPEFTILN  
LYHSEAFTVNFQDTE  
AGCPVGQTRTNTFEQ  
VYWDYAMTIRLEEIV  
PLKRLNNTWTNRYPD  
SCQRPNTGRLNGES  
LILEGTFTGTPPISV  
LQPTAGGTSKNEGTI  
EAISLSETVKKVEYD  
RRGRKPKTVLNGILS  
RNPEGSRTLSPSRGK  
VHERDVNTDFLLILL  
KQRKDKDTLKAEEKK  
ELPLIFITPLSDVKV  
PKPAVAHTAEREQVI  
SSGNCLHTDGNETNV  
PPDRFKFTSVTDSLE  
GTTVVKVTPDLKPT  
GIGPPVETIQRTTAR  
RMYLSCLTTSRSMTD  
RARHRCQTPHLLAAX  
IEYLMGGTYRCTYTR  
QPRPPPSTQAPSVNG  
MIKLRGKGLVRLF  
AGKASCTTHLYIKAP  
SMALYNRTRRISQTS  
DIKWVDDTHALGVFS  
VLSNVEVTLNVLADS  
RVFKIKSTVVVKDLV  
RELEIARTNQEHAAL  
EDISPVQTDALDSVR  
LCLEPPNTHRVSSFL  
XXXXMVLTLGESWPV  
SLGVILYTLVSGSLP  
VVVISGDTGCGKTTR  
RVCSKRGTTESKEVL  
DSEDESETIPTDKTV  
YGADHPYTARELEAL  
TSLHCALTEGLEILS  
LGGNSYVTWNYAWSK  
PRVRKPKTTPRKM  
QYHRGEMTALREELK  
NMVQRPSTVDFIDWV  
NIEECSLTQQNKSTV  
ILEILESTIEDYAQY  
SEDDNFGTAQSNKAI  
HQNVVAETLSALENK  
ESDSGDYTCIATNMA  
WKYYCLPTGWANFGV

EYDPSKATFVKVPT  
IYRGEELTYDYKFPI  
PGEKRKMTDSHVLEE  
ARAYPELTLAIFSEI  
KCIDPGKTLPEALDY  
KQLLEYQTMLKGRCP  
RLHQLHITGKLPAGS  
GDLPEAGTTRTFSVV  
LNPAVLSTASLGSSQ  
MTAFADRTVVTIAHR  
DDQELQITDRIKIQK  
ILGAKEGTQEFVHTE  
DGEWVYNTFCIYKRC  
AGAPPCTAVTSDHL  
ELPRHPPTFDNLYEY  
QNYHLECTETQAWMR  
PAIFGVLTKELLQLF  
RGISKHSTSGTDEGE  
LLHQGLSTSHFAWAF  
KVDMKDVTKINREKA  
AVQLNIFTAVLSALK  
DTTKVSFTYDETAGM  
KAVLQRKTACQDTDE  
TVQSKILTTGENYKT  
RRNCCYKTNSHGETV  
PDCNFRVTDVIEGTE  
RRGRAGATSGELPVV  
GKQPFLGTLQDNLIE  
KDAASFLTRMKEKHG  
CGNFDLKTINEMRTP  
KPDDKAKTLYEPLS  
SYWSIFMTLLHFVAS  
GDGPRSETKEFTTPE  
SRESKMQTRILKQDL  
CYIQHVDTGLWLTYQ  
YIEKRETSRLAWAL  
VSEPELATLSGDMAQ  
AYDPEDETILEEAKV  
SSKRRPRTRAQKVEV  
SPDPSSTPTSPVS  
LNESTFDTQITKKMG  
EVRKSALTLMGPLD  
VYYSRSKTTHIATN  
YVIVPLKTGLQEVEV  
VGIDLGSTGDTTEAL  
ALAVVDVTKRHVDLK  
ERKQERETFSSAEGT  
APKAPEVTTVTKDSM  
HYLHLRATVVSIQRR  
TKDKKIITNHQKKNL  
SDLDSNQTHSSGTVT  
PFKAAPHTIHPPCVV  
EGNDIRKTNVAQIRM  
SPFSSPETSFRGHHI  
IQRAAEESTEEVSSLR  
ANGEIAYTIAEGNTG  
YRKHYEDTKANVHIP  
GMMSDYGTARRTGTP  
MAHMFVSTNLGESFM  
QKICGKKTAFDPSVD

GQDYEHVTMLRDKFR  
RMEIKDQTKCAASVG  
EISSASRTCTFLPPF  
RDGQVISTSTLPGVQ  
KRFDYDYYTMMHRIKL  
DLKSLPDTELMKDTA  
EQNMIGMTPTVIAVH  
PKDPVIETIRNYFPE  
QSLPASQTHMRVTAS  
AVALVFLTGCQAWEF  
DTDENVGTCPVSAF  
HSNMQFSTFDRDADQ  
GFSWIEVTILKPHLQ  
KLKPDNTLCDEFKA  
HHLGKEFTPSAQAAF  
YILIGSSTSYCEIQG  
LGANGRHTSSWLVTTP  
GRIGRLVTRAAFNSG  
DSRFGSLTSNFKEFG  
PENLPPLTADFAEDK  
LKSNSMVTLGCLVKG  
FPESWLWTIEELKEP  
EPKNLVKTNCELYEK  
KAQEAGYTNATTTDQ  
GREEEFFTYRSSVTY  
SMILDICTRYLGDVD  
VKDSCVGTLVVKGDP  
YRLVGEATISCWYSQ  
YVVLARLTAQPAPSP  
DEANQDFTNRINKLK  
QDIIWDDTKQTVRVL  
CQNDIMLTATCKSDG  
LAKKYEATLEKCCAE  
NLLDNWDTLGSTVGR  
SLKYNFVTPLTHMVV  
DPPACYGTVLAEFQP
